# Supplementary material for: Health Risks of Polybrominated Diphenyl Ethers (PBDEs) and Metals at Informal Electronic Waste Recycling Sites
Source: PubMed Central journal article supplement (PMC6466049; doi:10.3390/ijerph16060906), 2019-03-13
Supplement: ijerph-16-00906-s001.pdf [file ijerph-16-00906-s001.pdf]

## Supplementary information

### Materials and Methods for the Polybrominated Diphenyl Ethers (PBDEs) analysis

#### 2.3. Sample collection and preparation

First, the 10ml amber bottles and aluminium foils were treated in the laboratory. The amber bottles were washed with tap water and laboratory detergent, rinsed with a copious amount of tap water, rinsed with distilled water 3 times, treated with acetone and with hexane, and then oven-dried at 120°C for 4 hours to ensure no traces of POPs were present. Aluminium foils (for sample wraps on the field) were treated with acetone and hexane, then oven dried at 120°C to ensure no traces of POPs in the aluminum foil.

On the field, for the soil sampling, each selected site was divided into grids of about 2 m to 10 m wide, depending on the size of the site. Samples were systematically collected from 3 to 6 points within each site. The samples were bulked together for the top soil to form a composite representative sample for the specific site. Soil samples were collected using a soil auger, and a soil trowel was used to transfer soil from the soil auger into aluminum foil (sample wraps). To avoid cross contamination, the soil probe/auger and trowel were decontaminated (cleaned first with a brush and wiped thoroughly with wipes) before each sample collection at each sampling site. Dust samples were collected using fiber dusting brushes to gently sweep the dust and collect it with a dustpan. The soil and dust samples were wrapped in a treated aluminum foil, labelled, and transported to the laboratory. A total of 71 samples (56 samples from the e-waste recycling sites and 15 samples from control sites) were analysed. The total set consisted of 22 top soil (0-10 cm depth) samples, 30 floor dust samples, 13 roadside dust samples, and 6 direct dust samples. Soil and dust samples were air dried for 7 days, avoiding exposure to sunlight. The samples were homogenized, ground with a mortar and pestle, and sieved through a 1 mm mesh sieve to remove bigger particles. Next, they were transferred into individual 10 ml amber bottles, labelled and stored at -20°C until shipping to the laboratory for analysis. The samples were collected between May and November 2015.

#### 2.4. Chemicals and materials

All the solvents used for extraction, purification and analysis were of HPLC grade (Spectrum Chemical MFG. Corp., USA). Silica gel (100-200 mesh) and neutral aluminum oxide (100-200 mesh) were for chromatography purpose (Sinopharm Chemical Reagent Co., Ltd, China), and they were activated before use (i.e., first washed with hexane/dichloromethane (v/v, 1/1) and then baked at 180 °C for 2 hours). Acid silica gel (30% w/w) was prepared with activated silica gel and sulphuric acid before use. Anhydrous sodium sulfate (99% purity) and diatomaceous earth (DE, 100% purity) were purchased from Aladdin Ind. Corp, China and Thermo Fisher Scientific respectively. They were baked at 400°C for 4 hours before use to remove any traces of organic matter.

A standard mixture solution of 14 PBDE congeners (BDE-COC) PBDEs (BDE-17, BDE-28, BDE-71, BDE-47, BDE-66, BDE-100, BDE-99, BDE-85, BDE-154, BDE-153, BDE-138, BDE-183, BDE-190, and BDE-209) and Individual standards of 4 PBDEs (BDE-77, BDE-206, BDE-207, BDE-208) and PCB-209 were purchased from Accu Standard, while Isotopically labeled <sup>13</sup>C-PCB-208 was purchased from Cambridge Isotope Laboratories. We used <sup>13</sup>C-PCB-208 as the surrogate because, we first used chemical ionization source (CI source) to detect PBDEs with the characteristic ionic fragments, and CI source cannot identify the difference between <sup>13</sup>C-labeled PBDEs and unlabeled PBDEs. Secondly, <sup>13</sup>C-PCB-208 can be identified by CI source, and its characteristic ionic fragments contain <sup>13</sup>C labeled carbon. Also, the physiochemical properties of PCBs and PBDEs are similar with PBDEs.

### 2.5. Sample extraction and cleanup

For the PBDE analysis, from each of the samples, 5g of homogenized sample was thoroughly mixed with 0.6g DE with a mortar and pestle. Each sample was thereafter spiked with 2ng <sup>13</sup>C- labeled PCB-208 and 10 ng PCB-209 standards, and allowed a static equilibration of 5 minutes in two cycles. The sample was then extracted using an ASE 350 accelerated solvent extraction system (Dionex, USA) with n-hexane/dichloromethane (v/v, 1/1) at 90°C, 1500 psi. After extraction, acid washed copper sheets were added to the extracts to remove sulfur present in the samples. The extracts were evaporated to about 10mL under a gentle stream of N<sub>2</sub>, and transferred to a conical centrifuge tube. One mL of concentrated sulfuric acid (98%) was added to the concentrated extracts to carbonize part of the impurities present. The supernatants were transferred to a preconditioned glass cleanup column, which was packed with 0.5 cm neutral aluminum oxide, 3.0 cm neutral silica gel, 3.0 cm acid silica gel, and 1.0 cm anhydrous sodium sulfate from the bottom to the top. The columns were then eluted with 20 mL hexane, and the eluent was evaporated to about 0.3 ml and transferred to a 1.5 ml sample vial. After the internal standard (10 ng BDE-77) had been added to the vial, the volume of the solution was made up to 0.5 ml. Many similar previous studies used BDE-77 as internal standard or surrogate [34-35].

### 2.6. Sample analysis

An Agilent 6890 GC/5975 MSD system operated in negative chemical ion source/ selective ion monitoring (NCI/SIM) mode and equipped with a 15 m DB-XLB column (0.25 mm, 0.1 μm film thickness, J&W) was used for PBDE separation and quantification. The samples (1 μL) were injected in split less mode. Helium was used as carrier gas at a flow rate of 1.2 mL/min, and the temperature program was set as follows: 90 °C for 2min, increased to 320 °C at 15 °C/min and held for 7 min. The temperature of GC inlet, transfer line, ionization source and quadrupole were set at 290°C, 300 °C, and 150 °C. The compounds were monitored at m/z 79 and 81 for 3-7 brominated BDEs, m/z 79, 81, 487 and 489 for BDE-206, 207, 208 and 209, m/z 474, 476 for <sup>13</sup>C-PCB-208, and m/z 497.6, 499.6 for PCB-209.

Soil pH was measured using a calibrated pH meter (691, Metrohm AG) in a weight: volume ratio of 1:10 of soil and tap water, adopting the USEPA method 9054D [36]. Total organic content (TOC) of the soil and dust was determined as the weight loss of dried soil (3 hours at 100 °C) at 550 °C for 5 hours [37]. Since PBDEs have a great potential to bind to environmental matrices rich in organic carbon [38], measuring the TOC concentration in the soil and dust samples was used to establish whether there was any correlation between the measured PBDEs and TOC.

### 2.7. Quality assurance/quality control

A meadow soil collected from a cropland in Liaoning, China (123.90°E, 41.38°N) which was tested and demonstrated to be free of most of the studied PBDEs, was used as matrix blank and matrix spike samples. Twenty ng BDE 206, 207, 208, 209 and 4ng of the other target PBDEs were spiked into 5 g meadow soil to evaluate the method performance. The recoveries for BDE-100, 154, 153, 183, 190, 208, 207, 206 and 209 were 60-107%. For BDE-28, 47, and 99, the recoveries were 32-58%. For all the target compounds, the relative standard deviations of duplicate samples were less than 14 %. The recoveries of BDE-17, 66, 71 and 85 were lower than 20%, therefore they were not excluded from the statistically analysis. For the spiked surrogate <sup>13</sup>C-PCB-208 and PCB-209, the average recoveries in all samples were 71% and 84%,

respectively. The method detection limits (MDLs) values characterized as 3 times signal-to-noise ratio were 8 – 164 pg/g for the target PBDEs (supplementary table). The procedural blanks and solvent blanks were analysed simultaneously with samples to check for interferences and contamination. The reported results of PBDEs in the samples were corrected by recoveries of <sup>13</sup>C-PCB-208. Three criteria were also used to ensure the correct identification of the target compounds [39]: (a) The GC (gas chromatography) retention times matched those of the authentic standards within  $\pm 0.1$  min. (b) the signal-to-noise ratio was greater than 3:1; and (c) the isotopic ratios between the quantitative and confirmation ions were within  $\pm 15\%$  of the theoretical values. Both <sup>13</sup>C-PCB-208 and PCB-209 were used as surrogate to indicate the stability of the recoveries of each sample. In addition, this measure helps to monitor the recoveries of the target compounds at different concentration level.

## **Materials and Methods for the metals analysis**

### *2.3 Sample collection and preparation*

For soil sampling, each site was divided into grids of about 10m radius, and samples were systematically collected from 3 to 6 points within the site. The samples were bulked together for the top soil (0-10 cm depth) to form a composite representative sample for the specific site. Soil samples were collected using a soil auger, and a soil trowel was used in the transfer of soil from the auger into sample wraps. To avoid cross contamination, the soil probe/auger and trowel were decontaminated (cleaned first with a brush and wiped thoroughly with wet wipes) before each sample collection at each sampling site. Dust samples were collected using plastic brushes to gently sweep the dust and collect it with a dustpan. The soil and dust samples were wrapped in an acetone treated aluminum foil, labelled, and transported to the laboratory. Soil and dust samples were air dried for 7 days, homogenized (ground with a mortar and pestle), and sieved through a 1 mm mesh sieve to remove bigger particles, transferred into treated aluminum foil and then into a zip-lock bag, and stored at -20 C. The samples were collected between May and November 2015. A total of 82 samples (62 samples from the e-waste recycling sites and 20 samples from control sites) were analysed. The samples consisted of 29 top soil (0-10 cm depth), 32 floor dust, 16 roadside dust, and 5 direct dust samples from electronics.

### *2.4 Soil analysis*

Soil pH was measured using a calibrated pH meter (691, Metrohm AG) in a (weight: volume) ratio of 1:10 of soil and tap water, adopting the USEPA method 9054D (USEPA 2004). The soil organic matter content (TOC) was determined as the weight loss of dried soil (3hours at 100 °C) at 550 °C for 5 hours (Pansu and Gautheyrou 2006). The total metal content in soil samples was analyzed for trace elements using an X-ray fluorescence (XRF) spectrometer. For the trace metal analyses, about 3g of dry soil was introduced into a sample plastic cup with a 4- $\mu$ m thick polypropylene film window, with the soil/dust samples settling on the film window. The samples were placed into the XRF spectrometer and analyzed for a fixed period of about 120 s. To check the accuracy of the analysis, each sample was analyzed at

least twice. Acid-purified sand (quartz, SiO<sub>2</sub>) was used as the media blank for determining detection limits of major and trace elements and heavy metals.

**Supplementary table 1: Median PBDE concentrations (ng/kg) and Exeedance of soil and dusts across various e-waste sites in Lagos**

| PBDE                 | Top Soil 0-10cm |               |         |                   |        |              |      | Floor dust (control soil) |         |              |        | Roadside dust     |              |
|----------------------|-----------------|---------------|---------|-------------------|--------|--------------|------|---------------------------|---------|--------------|--------|-------------------|--------------|
|                      | Control         | Burning sites |         | Dismantling sites |        | Repair sites |      | Dismantling sites         |         | Repair sites |        | Dismantling sites |              |
|                      | Median          | Median        | Exceed  | Median            | Exceed | Median       | Ex   | Median                    | Exceed  | Median       | Exceed | Median            | Exceed       |
| BDE-17               | 0± 0.01         | 3.71          |         | 0.08± 13          |        | 0.03±0.03    |      | 0.13±0.41                 |         | 0.02±0.03    |        | 0.12±0.09         |              |
| BDE-28               | 0.005± 0.04     | 40.54         | 8108    | 0.96± 7.6         | 192    | 0.02±0.02    | 4    | 0.9±4.8                   | 176     | 0.5±2.5      | 100    | 0.18±0.27         | 36.00        |
| BDE-71               | 0.12± 0.18      | 433.16        | 3610    | 9.4±45            | 78     | 0.13±0.13    | 1.08 | 23.3±54.2                 | 194     | 1.6±6.5      | 13     | 8.1±3.14          | 67.50        |
| BDE-47               | 0.04± 0.074     | 17.05         | 426     | 3.67± 41.12       | 92     | 0.1±0.1      | 2.50 | 6.3±5.2                   | 158     | 0.54±0.44    | 14     | 8.02±5.3          | 200.50       |
| BDE-66               | 0.02± 0.074     | 8.42          | 421     | 1.49± 22.7        | 75     | 0.04±0.04    | 2.00 | 1.4±2.8                   | 70      | 0.14±0.13    | 7      | 0.61±0.27         | 30.50        |
| BDE-100              | 0.06± 0.05      | 86.02         | 1434    | 1.4± 126.3        | 23     | 0.31±0.31    | 5.17 | 4.1±9                     | 68      | 0.4±0.15     | 6.7    | 4.44±2.54         | 74.00        |
| BDE-99               | 0.155± 0.172    | 158.11        | 1020    | 10.83± 209.4      | 70     | 0.53±0.53    | 3.42 | 15±23.8                   | 97      | 1.8±0.82     | 12     | 19±12             | 122.58       |
| BDE-85               | 0               | 22.22         |         | 0.04± 1.1         |        | 0±0          |      | 0.21±1.1                  |         | 0.01±0.02    |        | 0.47±0.41         |              |
| BDE-154              | 0.055± 0.053    | 80.25         | 1460    | 2.68± 44.5        | 49     | 0.21±0.21    | 3.82 | 5.4±4.6                   | 98      | 0.41±0.2     | 7.45   | 2.5±1.3           | 45.45        |
| BDE-153              | 0.085± 0.084    | 64.19         | 755     | 9.93± 159         | 117    | 0.24±0.24    | 2.82 | 8.9±2.3                   | 105     | 1.9±6.4      | 22.35  | 8.2±3.64          | 96.47        |
| BDE-138              | 0± 0.015        | 3.24          |         | 0.14± 02.2        |        | 0±0          |      | 0.82±2.8                  |         | 0.12±0.16    |        | 0.29±0.24         |              |
| BDE-183              | 0.065± 0.148    | 153.73        | 2365    | 11.41± 87.4       | 176    | 0.2±0.2      | 3.08 | 17.6±8.2                  | 270     | 5±19.1       | 77     | 10.76±6           | 165.54       |
| BDE-190              | 0.06± 0.045     | 164.12        | 2735    | 4.31± 76.2        | 72     | 0.19±1.9     | 3.17 | 3.3±10.6                  | 55      | 0.44±0.7     | 7.33   | 1.19±0.66         | 19.83        |
| BDE-208              | 0.12± 0.08      | 497.38        | 4145    | 8.66± 131.8       | 72     | 0.1±0.1      | 0.83 | 6.33±19.7                 | 53      | 3±5.6        | 25     | 3.28±2.5          | 27.33        |
| BDE-207              | 0.25± 0.142     | 952.29        | 3809    | 21.03± 291.3      | 84     | 0.17±0.17    | 0.68 | 18.8±18.6                 | 75      | 5.7±14.3     | 23     | 9.37±7.4          | 37.48        |
| BDE-206              | 0.145± 0.08     | 626.79        | 4323    | 8.72± 81.4        | 60     | 0.07±0.07    | 0.48 | 15±11.4                   | 104     | 2.8±14.2     | 19     | 9.49±7.2          | 65.45        |
| BDE-209              | 3.42± 3         | 17587         | 5143    | 1491±6065.3       | 436    | 0.85±0.85    | 0.25 | 3009±1176                 | 880     | 432.74±5850  | 127    | 961±1028          | 280.99       |
| Σ <sub>16</sub> PBDE | 1.2± 1.2        | 3311          | 2759.35 | 88±1340           | 73.33  | 2.34±2.34    | 1.95 | 125±166                   | 104.17  | 25±63        | 20.83  | 99±38.5           | <b>82.50</b> |
| Σ <sub>17</sub> PBDE | 4.67± 4         | 20899         | 4475.07 | 1579±7403         | 338.12 | 3.19±3.19    | 0.68 | 3134±1311                 | 671.092 | 452±5908     | 96.79  | 1060±1055         | 226.98       |
| pH                   | 8.04            | 7.7           |         | 7.89              |        | 7.87         |      | 8.4                       |         | 8.31         |        | 8.29              |              |
| TOC                  | 3.13            | 36.3          |         | 7.83              |        | 1.51         |      | 4.9                       |         | 3.35         |        | 4.43              |              |

Where there s no SD, n=1

**Supplementary table 2: Median metals concentrations (mg/kg) and Exeedance of soil and dusts across various e-waste sites in Lagos**

| Metals | Top Soil 0-10cm |               |        |                   |        |              |        | Floor dust (control soil) |        |              |        | Roadside dust     |        |
|--------|-----------------|---------------|--------|-------------------|--------|--------------|--------|---------------------------|--------|--------------|--------|-------------------|--------|
|        | Control         | Burning sites |        | Dismantling sites |        | Repair sites |        | Dismantling sites         |        | Repair sites |        | Dismantling sites |        |
|        | Median          | Median        | Exceed | Median            | Exceed | Median       | Exceed | Median                    | Exceed | Median       | Exceed | Median            | Exceed |
| V      | 43.8±16         | 24.2          | 0.6    | 50.85±46          | 1.16   | 10.2         | 0.23   | 38±11                     | 0.87   | 26±11        | 0.59   | 35±13             | 0.8    |
| Cr     | 70±19.3         | 68.7          | 1.0    | 103.2±52.2        | 1.47   | 49.3         | 0.70   | 78±24                     | 1.11   | 57±15        | 0.81   | 62.5±21           | 0.9    |
| Mn     | 116.5±27        | 160.1         | 1.4    | 694.9±153.14      | 5.96   | 81.4         | 0.70   | 680±965                   | 5.84   | 301±105      | 2.58   | 426±73            | 3.7    |
| Co     | 1.5±0           | 1.5           | 1.0    | 2.53±2.6          | 1.69   | 1.5          | 1.00   | 1.5±11                    | 1.00   | 1.5±0.6      | 1.00   | 2.8±1.8           | 1.9    |
| Ni     | 18±0.7          | 194.5         | 10.8   | 49.4±116.3        | 2.74   | 100          | 5.56   | 99.4±88                   | 5.52   | 28±37        | 1.56   | 83±32             | 4.6    |
| Cu     | 15±8            | 12590         | 839.3  | 759±5396          | 50.60  | 27.6         | 1.84   | 766±2904                  | 51.07  | 82±203       | 5.47   | 236±156           | 15.7   |
| Zn     | 44±15.3         | 3152          | 71.6   | 810.7±3920        | 18.43  | 24.5         | 0.56   | 1342±776                  | 30.50  | 312±286      | 7.09   | 924±462           | 21.0   |
| Ga     | 9±1.6           | 1.45          | 0.2    | 15.4±8.6          | 1.71   | 4            | 0.44   | 7.8±2.7                   | 0.87   | 4±2.7        | 0.44   | 5.8±1.7           | 0.6    |
| Ge     | 0.25±0.2        | 0.25          | 1.0    | 0.43±0.4          | 1.72   | 0.8          | 3.20   | 0.6±0.7                   | 2.40   | 0.25±0.3     | 1.00   | 2.1±1.3           | 8.4    |
| As     | 0.8±0.4         | 83.2          | 104.0  | 4.93±43           | 6.16   | 3.6          | 4.50   | 5.7±7                     | 7.13   | 0.25±1.8     | 0.31   | 13±3              | 16.3   |
| Se     | 0.25±0          | 6             | 24.0   | 0.2±4.4           | 0.80   | 0.25         | 1.00   | 0.65±0.6                  | 2.60   | 0.25±0.38    | 1.00   | 0.6±0.07          | 2.4    |
| Mo     | 0.5±1.2         | 8.5           | 17.0   | 0.5±10.15         | 1.00   | 1.5          | 3.00   | 0.5±3                     | 1.00   | 0.5±0.5      | 1.00   | 0.5±0             | 1.0    |
| Ag     | 1±2.5           | 41.1          | 41.1   | 5.5±152.2         | 5.50   | 1            | 1.00   | 34.5±17                   | 34.50  | 1.3±7.3      | 1.30   | 7.7±9.4           | 7.7    |
| Cd     | 2.55±0          | 10.4          | 4.1    | 2.55±0.38         | 1.00   | 2.55         | 1.00   | 2.55±0.18                 | 1.00   | 2.55±3       | 1.00   | 2.55±0            | 1.0    |
| Sn     | 1.5±0           | 2722          | 1814.7 | 53.35±1678        | 35.57  | 2.8          | 1.87   | 349±236                   | 232.67 | 106±748      | 70.67  | 63±44             | 42.0   |
| Sb     | 1.5±0.3         | 1544          | 1029.3 | 22.5±1016.5       | 15.00  | 1.5          | 1.00   | 43±94                     | 28.67  | 4±13.5       | 2.67   | 14±16             | 9.3    |
| Te     | 0.5±0           | 1.5           | 3.0    | 1.5±0             | 3.00   | 1.5          | 3.00   | 1.5±0                     | 3.00   | 1.5±0.3      | 3.00   | 1.5±0             | 3.0    |
| Ba     | 78.4±22.5       | 1378          | 17.6   | 256.35±2643       | 3.27   | 106.8        | 1.36   | 716±400                   | 9.13   | 227±60       | 2.90   | 498±164           | 6.4    |
| Hg     | 0.5±0           | 0.5           | 1.0    | 2.45±17           | 4.90   | 0.5          | 1.00   | 2.3±3.4                   | 4.60   | 0.5±2.7      | 1.00   | 0.18±0.18         | 0.4    |
| Tl     | 0.5±0           | 0.5           | 1.0    | 0.6±0.82          | 1.20   | 0.5          | 1.00   | 0.5±0.3                   | 1.00   | 0.5±0.18     | 1.00   | 0.75±0.2          | 1.5    |
| Pb     | 15.7±3          | 6358          | 405.0  | 199±3149          | 12.68  | 12.2         | 0.78   | 277±264                   | 17.64  | 57±393       | 3.63   | 374±118           | 23.8   |
| Ta     | 17.8±2          | 0.5           | 0.0    | 19.9±14.4         | 1.12   | 18           | 1.01   | 6±6                       | 0.34   | 16.4±6.4     | 0.92   | 21±1              | 1.2    |
| Fe     | 11860±2995      | 7373          | 0.6    | 31240±17226       | 2.63   | 11000        | 0.93   | 32960±77                  | 2.78   | 16610±668    | 1.40   | 24720±702         | 2.1    |
| Ti     | 7696±1802       | 4546          | 0.6    | 7804±2968         | 1.01   | 5108         | 0.66   | 4708±869                  | 0.61   | 3059±799     | 0.40   | 4538±210          | 0.6    |

Where there s no SD, n=1

**Supplementary table 3: Median PBDE concentrations (ng/kg) and Exeedance of soil and dusts across various e-waste sites in Ibadan**

| PBDE                      | Top Soil 0-10cm |               |        |                   |        | Floor dust (control soil) |         | Direct dust       |        |              |        |
|---------------------------|-----------------|---------------|--------|-------------------|--------|---------------------------|---------|-------------------|--------|--------------|--------|
|                           | Control         | Burning sites |        | Dismantling sites |        | Repair sites              |         | Dismantling sites |        | Repair sites |        |
|                           | Median          | Median        | Exceed | Median            | Exceed | Median                    | Exceed  | Median            | Exceed | Median       | Exceed |
| <b>BDE-17</b>             | 0±0             | 5.7±6.05      |        | 0±0.44            |        | 0.095±0.05                |         | 0.24±             |        | 0.37±1.65    |        |
| <b>BDE-28</b>             | 0.03±0.02       | 18.5±23.1     | 616.7  | 0.04±2.5          | 1.33   | 1.03±1.03                 | 34.33   | 1.24              | 41.33  | 3.8±12.14    | 127    |
| <b>BDE-71</b>             | 0.05±0.03       | 40.14±41      | 802.8  | 0.4±106           | 8      | 8.78±7.1                  | 176     | 18.21             | 364,2  | 23.2±39      | 464    |
| <b>BDE-47</b>             | 0.12±0.14       | 83±105        | 692.5  | 0.2±21.3          | 1,7    | 4.12±3.4                  | 34,33   | 64.6              | 538,33 | 14.62±38     | 121.83 |
| <b>BDE-66</b>             | 0.04±0.042      | 25±32.6       | 625    | 0.04±7.04         | 1      | 1.1±0.6                   | 27.5    | 5.4               | 135    | 2.53±9.7     | 63.25  |
| <b>BDE-100</b>            | 0.1±0.08        | 20±19.3       | 200    | 0.17±10.53        | 1.7    | 1.51±1.06                 | 15.1    | 24.2              | 242    | 4.8±2.5      | 48     |
| <b>BDE-99</b>             | 0.27±0.04       | 107±129.3     | 396.3  | 0.42±34.2         | 1.6    | 10.64±4.3                 | 39.41   | 151.2             | 560    | 26±27.22     | 95.2   |
| <b>BDE-85</b>             | 0.005±0.007     | 8±8.3         | 1600   | 0±2.2             | 0      | 0.31±0.24                 | 62      | 4.14              | 828    | 1.04±1.2     | 208    |
| <b>BDE-154</b>            | 0.09±0.06       | 22.5±19       | 250    | 0.1±4             | 1.1    | 1.61±2.3                  | 18      | 12.4              | 138    | 4.3±2.14     | 47.8   |
| <b>BDE-153</b>            | 0.17±0.04       | 60±59.4       | 363.6  | 0.5±14.2          | 3.03   | 7.5±21                    | 45.5    | 33.1              | 201    | 12.4±10.35   | 75.15  |
| <b>BDE-138</b>            | 0±0             | 3.5±2.4       |        | 0±1.7             |        | 0,43±0.71                 |         | 1.73              |        | 1.05±0.7     |        |
| <b>BDE-183</b>            | 0.07±0.3        | 38.7±44.4     | 553    | 1.2±6.64          | 17.14  | 14.5±81                   | 206.57  | 16.7              | 238.6  | 15.5±33.1    | 221.42 |
| <b>BDE-190</b>            | 0.03±0.014      | 32.4±23.3     | 1080   | 0.1±0.5           | 3.33   | 1.5±3.8                   | 50      | 2.6               | 87     | 4.9±3.1      | 163.33 |
| <b>BDE-208</b>            | 0.15±0.3        | 173.5±173.5   | 1157   | 1.2±4             | 8      | 25±21                     | 164.7   | 14.2              | 94.5   | 25.3±176.2   | 168,33 |
| <b>BDE-207</b>            | 0.27±0.35       | 367.3±495     | 1360   | 1.9±8.2           | 7.04   | 78.4±49                   | 290.37  | 31.7              | 117.41 | 42±374       | 155.6  |
| <b>BDE-206</b>            | 0.19±0.07       | 120±158.3     | 632    | 0.4±6.3           | 2.11   | 65±65.45                  | 342.105 | 31.7              | 166.8  | 33.44±599    | 176    |
| <b>BDE-209</b>            | 9±0.83          | 5850±7861     | 650    | 13±412            | 1.44   | 8043±6416                 | 893.7   | 3181              | 353.4  | 1464±68591   | 162.7  |
| <b>Σ<sub>16</sub>PBDE</b> | 1,56±0.2        | 1124±1381     | 720,51 | 5,1±228.4         | 3,269  | 237±189                   | 151,92  | 413               | 264,74 | 221±1268.2   | 142    |
| <b>Σ<sub>17</sub>PBDE</b> | 10,54±1.03      | 6974±9242     | 661,67 | 18,00±639         | 1,708  | 8280±6587.5               | 785,58  | 3594              | 340,99 | 1685±69855   | 160    |
| <b>pH</b>                 | 8.2             | 8.19          |        | 5                 |        | 8.8                       |         | -                 |        | 9            |        |
| <b>TOC</b>                | 3.6             | 16.78         |        | 5.8               |        | 5.29                      |         | -                 |        | 18.56        |        |

In case SD is not given, n=1

Supplementary table 4: Median metal concentrations (mg/kg) and Exeedance of soil and dusts across various e-waste sites in Ibadan

| Metals    | Top Soil 0-10cm |               |        |                   |        | Floor dust<br>(control soil) |        | Direct dust       |        |              |        |
|-----------|-----------------|---------------|--------|-------------------|--------|------------------------------|--------|-------------------|--------|--------------|--------|
|           | Control         | Burning sites |        | Dismantling sites |        | Repair sites                 |        | Dismantling sites |        | Repair sites |        |
|           | Median          | Median        | Exceed | Median            | Exceed | Median                       | Exceed | Median            | Exceed | Median       | Exceed |
| <b>V</b>  | 80±12           | 54±3          | 0.68   | 55.2±24           | 0.69   | 65±21                        | 0.81   | 922               | 11.53  | 111±44       | 1.39   |
| <b>Cr</b> | 141±155         | 123±44        | 0.87   | 105±55            | 0.74   | 121±25                       | 0.86   | 14.3              | 0.10   | 141±49       | 1.00   |
| <b>Mn</b> | 597±16          | 740±460       | 1.24   | 562±805           | 0.94   | 758±164                      | 1.27   | 1607              | 2.69   | 797±367      | 1.34   |
| <b>Co</b> | 8.3±1.4         | 1.5±0         | 0.18   | 1.5±44            | 0.18   | 1.5±2.6                      | 0.18   | 72.3              | 8.71   | 1.5±19       | 0.18   |
| <b>Ni</b> | 51.3±17         | 93±56         | 1.81   | 65±62             | 1.27   | 43±16                        | 0.84   | 320               | 6.24   | 78±30        | 1.52   |
| <b>Cu</b> | 70±27           | 12749±3976    | 182.13 | 1344±4893         | 19.20  | 323±351                      | 4.61   | 42                | 0.60   | 321±724      | 4.59   |
| <b>Zn</b> | 300±174         | 3327±901      | 11.09  | 1829±3035         | 6.10   | 1152±512                     | 3.84   | 122               | 0.41   | 2464±674     | 8.21   |
| <b>Ga</b> | 8.6±3           | 5.2±7         | 0.60   | 10±9              | 1.16   | 3±2.4                        | 0.35   | 21                | 2.44   | 7.6±4        | 0.88   |
| <b>Ge</b> | 1.1±1.2         | 0.25±0        | 0.23   | 0.25±0.33         | 0.23   | 0.6±0.4                      | 0.55   | 1                 | 0.91   | 0.73±7.3     | 0.66   |
| <b>As</b> | 4±5             | 103±64        | 25.75  | 10.3±22           | 2.58   | 0.25±2.8                     | 0.06   | 1.2               | 0.30   | 5±30         | 1.25   |
| <b>Se</b> | 0.5±0.46        | 26±30         | 52.00  | 4.4±17            | 8.80   | 1±2.9                        | 2.00   | 0.25              | 0.50   | 0.9±1.4      | 1.80   |
| <b>Mo</b> | 4.2±2.8         | 8±0.35        | 1.90   | 7.2±7.2           | 1.71   | 0.6±1.5                      | 0.14   | 1.3               | 0.31   | 2.7±1.4      | 0.64   |
| <b>Ag</b> | 14.2±19         | 16±7          | 1.13   | 8.5±28            | 0.60   | 5.5±28                       | 0.39   | 1.35              | 0.10   | 15±12        | 1.06   |
| <b>Cd</b> | 2.55±0          | 7±5           | 2.75   | 2.55±6            | 1.00   | 2.55±1.6                     | 1.00   | 2.55              | 1.00   | 2.7±2.7      | 1.06   |
| <b>Sn</b> | 44.4±44         | 1214±489      | 27.34  | 118±160           | 2.66   | 970±3948                     | 21.85  | 1.5               | 0.03   | 53±533       | 1.19   |
| <b>Sb</b> | 2±0.7           | 592±346       | 296.00 | 52±56             | 26.00  | 20±74                        | 10.00  | 1.5               | 0.75   | 48±322       | 24.00  |
| <b>Te</b> | 1.5±0           | 1.5±0         | 1.00   | 1.5±0             | 1.00   | 1.5±0                        | 1.00   | 1.5               | 1.00   | 1.5±0        | 1.00   |
| <b>Ba</b> | 638±269         | 930±419       | 1.46   | 589±250           | 0.92   | 469±136                      | 0.74   | 90                | 0.14   | 1049±2502    | 1.64   |
| <b>Hg</b> | 1.1±0.8         | 4.6±5.7       | 4.18   | 1.3±7             | 1.18   | 0.7±0.95                     | 0.64   | 0.5               | 0.45   | 2.7±1.6      | 2.45   |
| <b>Tl</b> | 0.9±0.14        | 10±13         | 11.11  | 0.8±8             | 0.89   | 0.7±0.34                     | 0.78   | 0.5               | 0.56   | 2.25±1.1     | 2.50   |
| <b>Pb</b> | 305±107         | 21423±24194   | 70.24  | 2455±16964        | 8.05   | 950±2833                     | 3.11   | 0.5               | 0.00   | 451±752      | 1.48   |
| <b>Ta</b> | 21±1.3          | 0.5±0         | 0.02   | 14±37             | 0.67   | 16±4                         | 0.76   | 18                | 0.86   | 36±32        | 1.71   |
| <b>Fe</b> | 35835±6993      | 31435±7191    | 0.88   | 50110±51698       | 1.40   | 42540±174                    | 1.19   | 175000            | 4.88   | 57365±2240   | 1.60   |
| <b>Ti</b> | 5265±744        | 6595±2029     | 1.25   | 4691±2243         | 0.89   | 3478±589                     | 0.66   | 53190             | 10.10  | 4958±1846    | 0.94   |

In case SD is not given, n=1



Supplementary table 5: Median PBDE concentrations (ng/kg) and Exceedance of soil and dusts across various e-waste sites in Aba

| Top Soil 0-10cm (control Roadside dust) |            |               |        | Floor dust (control roadside dust) |        | Roadside dust (control roadside dust) |        |
|-----------------------------------------|------------|---------------|--------|------------------------------------|--------|---------------------------------------|--------|
| PBDE                                    | Control    | Burning sites |        | Repair sites                       |        | Repair sites                          |        |
|                                         | Median     | Median        | Exceed | Median                             | Exceed | Median                                | Exceed |
| BDE-17                                  | 0±0.005    | 0.65±0.9      | 0      | 0.03±0.07                          | 0      | 0.31±0.31                             | 0      |
| BDE-28                                  | 0.02±0.032 | 2.3±3         | 115    | 0.16±0.6                           | 8      | 1.44±1.44                             | 72.00  |
| BDE-71                                  | 0.06±0.136 | 5.6±7.13      | 93.33  | 0.73±2.9                           | 12.17  | 3.35±3.35                             | 55.83  |
| BDE-47                                  | 0.47±0.14  | 5.6±6.2       | 11.91  | 1.42±3.53                          | 3.02   | 3.9±3.9                               | 8.30   |
| BDE-66                                  | 0.4±0.12   | 2.3±3.1       | 5.75   | 0.2±0.93                           | 0.50   | 1.6±1.6                               | 4.00   |
| BDE-100                                 | 0.18±0.13  | 1.64±1.34     | 9.11   | 0.38±0.69                          | 2.11   | 0.6±0.6                               | 3.33   |
| BDE-99                                  | 1.08±0.53  | 11.7±13       | 10.83  | 2.55±6.1                           | 2.36   | 5.84±5.84                             | 5.41   |
| BDE-85                                  | 0.04±0.017 | 4.85±6.8      | 121.25 | 0.13±0.15                          | 3.25   | 0                                     | 0.00   |
| BDE-154                                 | 0.13±0.071 | 7.74±10       | 59.54  | 0.43±0.51                          | 3.31   | 2.46±2.46                             | 18.92  |
| BDE-153                                 | 0.23±0.071 | 20.7±27.24    | 90.00  | 1.6±2.2                            | 6.96   | 7.9±7.9                               | 34.35  |
| BDE-138                                 | 0.02±0.32  | 1.6±2         | 80.00  | 0.1±0.09                           | 5.00   | 0.54±0.54                             | 27.00  |
| BDE-183                                 | 0.33±0.5   | 13.4±17.8     | 40.61  | 8.72±6.5                           | 26.42  | 4.56±4.56                             | 13.82  |
| BDE-190                                 | 0.07±0.05  | 7.5±9.3       | 107.14 | 0.37±0.46                          | 5.29   | 2.82±2.82                             | 40.29  |
| BDE-208                                 | 0.57±0.16  | 4.4±1.34      | 7.72   | 3.4±18.4                           | 5.96   | 2.57±2.57                             | 4.51   |
| BDE-207                                 | 1.13±0.35  | 8.74±9        | 7.73   | 10±46                              | 8.85   | 3.46±3.46                             | 3.06   |
| BDE-206                                 | 1.2±0.3    | 3.63±3.2      | 3.03   | 6±72.6                             | 5.00   | 2.15±2.15                             | 1.79   |
| BDE-209                                 | 71.5±62.8  | 103.3±67.7    | 1.44   | 534±6853                           | 7.47   | 69±69                                 | 0.97   |
| ∑ <sub>16</sub> PBDE                    | 5.68±1.95  | 102.25±124    | 18.00  | 41.56±140.51                       | 7.32   | 42±42                                 | 7.39   |
| ∑ <sub>17</sub> PBDE                    | 77.7±61.8  | 205.55±205.6  | 2.65   | 553.15±6982.4                      | 7.12   | 111.4±11.4                            | 1.43   |
| pH                                      |            | 7.52          |        | 8.11                               |        | 8.1                                   |        |
| TOC                                     |            | 16.11         |        | 2.46                               |        | 1.5                                   |        |

Supplementary table 6: Median metals concentrations (mg/kg) and Exceedance of soil and dusts across various e-waste sites in Aba

| PBDE | Top Soil 0-10cm (control soil) |               |         |                   |         | Floor dust (control soil) |         |              |        | Roadside dust (Roadside dustsoil) |        |
|------|--------------------------------|---------------|---------|-------------------|---------|---------------------------|---------|--------------|--------|-----------------------------------|--------|
|      | Control                        | Burning sites |         | Dismantling sites |         | Dismantling sites         |         | Repair sites |        | Dismantling sites                 |        |
|      | Median                         | Median        | Exceed  | Median            | Exceed  | Median                    | Exceed  | Median       | Exceed | Median                            | Exceed |
| V    | 39±44                          | 28±18         | 0.72    | 46                | 1.18    | 26                        | 0.67    | 17±8         | 0.44   | 42                                | 1.08   |
| Cr   | 63±15                          | 102±48        | 1.62    | 197               | 3.13    | 188                       | 2.98    | 42±11        | 0.67   | 30                                | 0.48   |
| Mn   | 257±3.5                        | 419±46        | 1.63    | 540               | 2.10    | 654                       | 2.54    | 307±45       | 1.19   | 274                               | 1.07   |
| Co   | 1.5±0                          | 1.5±0         | 1.00    | 1.5               | 1.00    | 1.5                       | 1.00    | 1.5±0        | 1.00   | 1.5                               | 1.00   |
| Ni   | 20±6                           | 86±14         | 4.30    | 153               | 7.65    | 149                       | 7.45    | 23±10        | 1.15   | 16                                | 0.80   |
| Cu   | 21±3                           | 4435±10306    | 211.19  | 7880              | 375.24  | 13580                     | 646.67  | 191±476      | 9.10   | 23                                | 1.10   |
| Zn   | 85±14                          | 3553±3412     | 41.80   | 5650              | 66.47   | 5401                      | 63.54   | 474±243      | 5.58   | 119                               | 1.40   |
| Ga   | 10±5                           | 10±7.4        | 1.00    | 14.5              | 1.45    | 15                        | 1.50    | 1.8±3        | 0.18   | 4.7                               | 0.47   |
| Ge   | 0.5±0.3                        | 0.7±0.4       | 1.40    | 0.25              | 0.50    | 0.25                      | 0.50    | 0.25±11      | 0.50   | 0.25                              | 0.50   |
| As   | 2±0.3                          | 24±45         | 12.00   | 40                | 20.00   | 71                        | 35.50   | 0.25±0.3     | 0.13   | 0.25                              | 0.13   |
| Se   | 0.25±0                         | 2.5±4.3       | 10.00   | 11.5              | 46.00   | 4                         | 16.00   | 0.25±0.9     | 1.00   | 0.25                              | 1.00   |
| Mo   | 0.5±0                          | 14±8          | 28.00   | 17                | 34.00   | 17.5                      | 35.00   | 0.5±0.3      | 1.00   | 0.5                               | 1.00   |
| Ag   | 1±0                            | 8±5           | 8.00    | 14.5              | 14.50   | 40                        | 40.00   | 1±8          | 1.00   | 1                                 | 1.00   |
| Cd   | 2.55±0                         | 0.5±1.3       | 0.20    | 24                | 9.41    | 30                        | 11.76   | 2.55±0       | 1.00   | 2.55                              | 1.00   |
| Sn   | 1.5±0                          | 81±1144       | 54.00   | 238               | 158.67  | 740                       | 493.33  | 338±1705     | 225.33 | 5.5                               | 3.67   |
| Sb   | 1.4±0.4                        | 49±800        | 35.00   | 203               | 145.00  | 382                       | 272.86  | 10±22        | 7.14   | 1.1                               | 0.79   |
| Te   | 1.5±0                          | 1.5±0         | 1.00    | 1.5               | 1.00    | 1.5                       | 1.00    | 1.5±0        | 1.00   | 1.5                               | 1.00   |
| Ba   | 60±9                           | 973±5740      | 16.22   | 3906              | 65.10   | 992                       | 16.53   | 215±105      | 3.58   | 170                               | 2.83   |
| Hg   | 18.5±1                         | 0.5±0.7       | 0.03    | 0.5               | 0.03    | 0.5                       | 0.03    | 0.5±0.2      | 0.03   | 1                                 | 0.05   |
| Tl   | 0.9±0.5                        | 0.5±1.9       | 0.56    | 0.5               | 0.56    | 0.5                       | 0.56    | 0.5±0.15     | 0.56   | 0.5                               | 0.56   |
| Pb   | 0.5±0                          | 1505±4332     | 3010.00 | 2271              | 4542.00 | 3770                      | 7540.00 | 150±955      | 300.00 | 34                                | 68.00  |
| Ta   | 29±18                          | 0.5±0         | 0.02    | 1                 | 0.03    | 1                         | 0.03    | 17±8         | 0.59   | 26                                | 0.90   |
| Fe   | 21710±9659                     | 51330±7850    | 2.36    | 70090             | 3.23    | 97260                     | 4.48    | 18860±7459   | 0.87   | 17780                             | 0.82   |
| Ti   | 8314±371                       | 5748±2142     | 0.69    | 2608              | 0.31    | 4969                      | 0.60    | 3850±1059    | 0.46   | 5488                              | 0.66   |

In case SD is not given, n=1

Supplementary table 7: PBDEs: Estimation of Average Daily dose (ADD) via ingestion, inhalation, and dermal uptake via soil and dust at various e-waste in Lagos

| PBDE           | Top Soil 0-10cm    |                    |                    |                    |                    |                    |                    |                    |                    | Floor dust (control soil) |                    |                    |                    |                    |                    | Roadside dust      |                    |                    |
|----------------|--------------------|--------------------|--------------------|--------------------|--------------------|--------------------|--------------------|--------------------|--------------------|---------------------------|--------------------|--------------------|--------------------|--------------------|--------------------|--------------------|--------------------|--------------------|
|                | Burning sites      |                    |                    | Dismantling sites  |                    |                    | Repair sites       |                    |                    | Dismantling sites         |                    |                    | Repair sites       |                    |                    | Repair sites       |                    |                    |
|                | ADD <sub>ing</sub> | ADD <sub>inh</sub> | ADD <sub>der</sub> | ADD <sub>ing</sub> | ADD <sub>inh</sub> | ADD <sub>der</sub> | ADD <sub>ing</sub> | ADD <sub>inh</sub> | ADD <sub>der</sub> | ADD <sub>ing</sub>        | ADD <sub>inh</sub> | ADD <sub>der</sub> | ADD <sub>ing</sub> | ADD <sub>inh</sub> | ADD <sub>der</sub> | ADD <sub>ing</sub> | ADD <sub>inh</sub> | ADD <sub>der</sub> |
| <b>BDE-17</b>  | 1.4E-06            | 6.3E-15            | 2.0E-03            | 3.1E-08            | 1.4E-16            | 4.3E-05            | 1.2E-08            | 5.1E-17            | 1.6E-05            | 5.0E-08                   | 2.2E-16            | 6.9E-05            | 7.7E-09            | 3.4E-17            | 1.1E-05            | 4.6E-08            | 2.0E-16            | 6.4E-05            |
| <b>BDE-28</b>  | 1.6E-05            | 6.9E-14            | 2.2E-02            | 3.7E-07            | 1.6E-15            | 5.1E-04            | 7.7E-09            | 3.4E-17            | 1.1E-05            | 3.4E-07                   | 1.5E-15            | 4.7E-04            | 1.9E-07            | 8.5E-16            | 2.7E-04            | 6.9E-08            | 3.0E-16            | 9.6E-05            |
| <b>BDE-71</b>  | 1.7E-04            | 7.3E-13            | 2.3E-01            | 3.6E-06            | 1.6E-14            | 5.0E-03            | 5.0E-08            | 2.2E-16            | 6.9E-05            | 8.9E-06                   | 3.9E-14            | 1.2E-02            | 6.1E-07            | 2.7E-15            | 8.5E-04            | 3.1E-06            | 1.4E-14            | 4.3E-03            |
| <b>BDE-47</b>  | 6.5E-06            | 2.9E-14            | 9.1E-03            | 1.4E-06            | 6.2E-15            | 2.0E-03            | 3.8E-08            | 1.7E-16            | 5.3E-05            | 2.4E-06                   | 1.1E-14            | 3.4E-03            | 2.1E-07            | 9.1E-16            | 2.9E-04            | 3.1E-06            | 1.4E-14            | 4.3E-03            |
| <b>BDE-66</b>  | 3.2E-06            | 1.4E-14            | 4.5E-03            | 5.7E-07            | 2.5E-15            | 7.9E-04            | 1.5E-08            | 6.8E-17            | 2.1E-05            | 5.4E-07                   | 2.4E-15            | 7.5E-04            | 5.4E-08            | 2.4E-16            | 7.5E-05            | 2.3E-07            | 1.0E-15            | 3.2E-04            |
| <b>BDE-100</b> | 3.3E-05            | 1.5E-13            | 4.6E-02            | 5.4E-07            | 2.4E-15            | 7.5E-04            | 1.2E-07            | 5.3E-16            | 1.7E-04            | 1.6E-06                   | 6.9E-15            | 2.2E-03            | 1.5E-07            | 6.8E-16            | 2.1E-04            | 1.7E-06            | 7.5E-15            | 2.4E-03            |
| <b>BDE-99</b>  | 6.1E-05            | 2.7E-13            | 8.4E-02            | 4.2E-06            | 1.8E-14            | 5.8E-03            | 2.0E-07            | 9.0E-16            | 2.8E-04            | 5.8E-06                   | 2.6E-14            | 8.0E-03            | 6.9E-07            | 3.0E-15            | 9.6E-04            | 7.3E-06            | 3.2E-14            | 1.0E-02            |
| <b>BDE-85</b>  | 8.5E-06            | 3.8E-14            | 1.2E-02            | 1.5E-08            | 6.8E-17            | 2.1E-05            | 0.0E+00            | 0.0E+00            | 0.0E+00            | 8.1E-08                   | 3.6E-16            | 1.1E-04            | 3.8E-09            | 1.7E-17            | 5.3E-06            | 1.8E-07            | 8.0E-16            | 2.5E-04            |
| <b>BDE-154</b> | 3.1E-05            | 1.4E-13            | 4.3E-02            | 1.0E-06            | 4.5E-15            | 1.4E-03            | 8.1E-08            | 3.6E-16            | 1.1E-04            | 2.1E-06                   | 9.2E-15            | 2.9E-03            | 1.6E-07            | 6.9E-16            | 2.2E-04            | 9.6E-07            | 4.2E-15            | 1.3E-03            |
| <b>BDE-153</b> | 2.5E-05            | 1.1E-13            | 3.4E-02            | 3.8E-06            | 1.7E-14            | 5.3E-03            | 9.2E-08            | 4.1E-16            | 1.3E-04            | 3.4E-06                   | 1.5E-14            | 4.7E-03            | 7.3E-07            | 3.2E-15            | 1.0E-03            | 3.1E-06            | 1.4E-14            | 4.4E-03            |
| <b>BDE-138</b> | 1.2E-06            | 5.5E-15            | 1.7E-03            | 5.4E-08            | 2.4E-16            | 7.5E-05            | 0.0E+00            | 0.0E+00            | 0.0E+00            | 3.1E-07                   | 1.4E-15            | 4.4E-04            | 4.6E-08            | 2.0E-16            | 6.4E-05            | 1.1E-07            | 4.9E-16            | 1.5E-04            |
| <b>BDE-183</b> | 5.9E-05            | 2.6E-13            | 8.2E-02            | 4.4E-06            | 1.9E-14            | 6.1E-03            | 7.7E-08            | 3.4E-16            | 1.1E-04            | 6.7E-06                   | 3.0E-14            | 9.4E-03            | 1.9E-06            | 8.5E-15            | 2.7E-03            | 4.1E-06            | 1.8E-14            | 5.7E-03            |
| <b>BDE-190</b> | 6.3E-05            | 2.8E-13            | 8.7E-02            | 1.7E-06            | 7.3E-15            | 2.3E-03            | 7.3E-08            | 3.2E-16            | 1.0E-04            | 1.3E-06                   | 5.6E-15            | 1.8E-03            | 1.7E-07            | 7.5E-16            | 2.3E-04            | 4.6E-07            | 2.0E-15            | 6.3E-04            |
| <b>BDE-208</b> | 1.9E-04            | 8.4E-13            | 2.6E-01            | 3.3E-06            | 1.5E-14            | 4.6E-03            | 3.8E-08            | 1.7E-16            | 5.3E-05            | 2.4E-06                   | 1.1E-14            | 3.4E-03            | 1.2E-06            | 5.1E-15            | 1.6E-03            | 1.3E-06            | 5.6E-15            | 1.7E-03            |
| <b>BDE-207</b> | 3.7E-04            | 1.6E-12            | 5.1E-01            | 8.1E-06            | 3.6E-14            | 1.1E-02            | 6.5E-08            | 2.9E-16            | 9.1E-05            | 7.2E-06                   | 3.2E-14            | 1.0E-02            | 2.2E-06            | 9.7E-15            | 3.0E-03            | 3.6E-06            | 1.6E-14            | 5.0E-03            |
| <b>BDE-206</b> | 2.4E-04            | 1.1E-12            | 3.3E-01            | 3.3E-06            | 1.5E-14            | 4.6E-03            | 2.7E-08            | 1.2E-16            | 3.7E-05            | 5.8E-06                   | 2.6E-14            | 8.0E-03            | 1.1E-06            | 4.7E-15            | 1.5E-03            | 3.6E-06            | 1.6E-14            | 5.1E-03            |
| <b>BDE-209</b> | 6.8E-03            | 3.0E-11            | 9.4E+00            | 5.7E-04            | 2.5E-12            | 7.9E-01            | 3.3E-07            | 1.4E-15            | 4.5E-04            | 1.2E-03                   | 5.1E-12            | 1.6E+00            | 1.7E-04            | 7.3E-13            | 2.3E-01            | 3.7E-04            | 1.6E-12            | 5.1E-01            |
| <b>ΣPBDE</b>   | <b>8.0E-03</b>     | <b>3.5E-11</b>     | <b>1.1E+01</b>     | <b>6.1E-04</b>     | <b>2.7E-12</b>     | <b>8.4E-01</b>     | <b>1.2E-06</b>     | <b>5.4E-15</b>     | <b>1.7E-03</b>     | <b>1.2E-03</b>            | <b>5.3E-12</b>     | <b>1.7E+00</b>     | <b>1.8E-04</b>     | <b>7.7E-13</b>     | <b>2.4E-01</b>     | <b>4.0E-04</b>     | <b>1.8E-12</b>     | <b>5.6E-01</b>     |

Supplementary table 8.PBDEs: Estimation of Average Daily dose (ADD) via ingestion, inhalation, and dermal uptake via soil and dust at various e-waste sites and in Ibadan

| PBDE           | Top Soil 0-10cm    |                    |                    |                    |                    |                    | Floor dust (control soil) |                    |                    | Direct dust        |                    |                    |                    |                    |                    |
|----------------|--------------------|--------------------|--------------------|--------------------|--------------------|--------------------|---------------------------|--------------------|--------------------|--------------------|--------------------|--------------------|--------------------|--------------------|--------------------|
|                | Burning sites      |                    |                    | Dismantling sites  |                    |                    | Repair sites              |                    |                    | Dismantling sites  |                    |                    | Repair sites       |                    |                    |
|                | ADD <sub>ing</sub> | ADD <sub>inh</sub> | ADD <sub>der</sub> | ADD <sub>ing</sub> | ADD <sub>inh</sub> | ADD <sub>der</sub> | ADD <sub>ing</sub>        | ADD <sub>inh</sub> | ADD <sub>der</sub> | ADD <sub>ing</sub> | ADD <sub>inh</sub> | ADD <sub>der</sub> | ADD <sub>ing</sub> | ADD <sub>inh</sub> | ADD <sub>der</sub> |
| <b>BDE-17</b>  | 2.2E-06            | 9.7E-15            | 3.0E-03            | 0.0E+00            | 0.0E+00            | 0.0E+00            | 3.6E-08                   | 1.6E-16            | 5.1E-05            | 9.2E-08            | 4.1E-16            | 1.3E-04            | 1.4E-07            | 6.3E-16            | 2.0E-04            |
| <b>BDE-28</b>  | 7.1E-06            | 3.1E-14            | 9.9E-03            | 1.5E-08            | 6.8E-17            | 2.1E-05            | 4.0E-07                   | 1.7E-15            | 5.5E-04            | 4.8E-07            | 2.1E-15            | 6.6E-04            | 1.5E-06            | 6.4E-15            | 2.0E-03            |
| <b>BDE-71</b>  | 1.5E-05            | 6.8E-14            | 2.1E-02            | 1.5E-07            | 6.8E-16            | 2.1E-04            | 3.4E-06                   | 1.5E-14            | 4.7E-03            | 7.0E-06            | 3.1E-14            | 9.7E-03            | 8.9E-06            | 3.9E-14            | 1.2E-02            |
| <b>BDE-47</b>  | 3.2E-05            | 1.4E-13            | 4.4E-02            | 7.7E-08            | 3.4E-16            | 1.1E-04            | 1.6E-06                   | 7.0E-15            | 2.2E-03            | 2.5E-05            | 1.1E-13            | 3.4E-02            | 5.6E-06            | 2.5E-14            | 7.8E-03            |
| <b>BDE-66</b>  | 9.6E-06            | 4.2E-14            | 1.3E-02            | 1.5E-08            | 6.8E-17            | 2.1E-05            | 4.2E-07                   | 1.9E-15            | 5.9E-04            | 2.1E-06            | 9.1E-15            | 2.9E-03            | 9.7E-07            | 4.3E-15            | 1.3E-03            |
| <b>BDE-100</b> | 7.7E-06            | 3.4E-14            | 1.1E-02            | 6.5E-08            | 2.9E-16            | 9.1E-05            | 5.8E-07                   | 2.6E-15            | 8.0E-04            | 9.3E-06            | 4.1E-14            | 1.3E-02            | 1.8E-06            | 8.1E-15            | 2.6E-03            |
| <b>BDE-99</b>  | 4.1E-05            | 1.8E-13            | 5.7E-02            | 1.6E-07            | 7.1E-16            | 2.2E-04            | 4.1E-06                   | 1.8E-14            | 5.7E-03            | 5.8E-05            | 2.6E-13            | 8.1E-02            | 9.9E-06            | 4.4E-14            | 1.4E-02            |
| <b>BDE-85</b>  | 3.1E-06            | 1.4E-14            | 4.3E-03            | 0.0E+00            | 0.0E+00            | 0.0E+00            | 1.2E-07                   | 5.3E-16            | 1.7E-04            | 1.6E-06            | 7.0E-15            | 2.2E-03            | 4.0E-07            | 1.8E-15            | 5.5E-04            |
| <b>BDE-154</b> | 8.6E-06            | 3.8E-14            | 1.2E-02            | 3.8E-08            | 1.7E-16            | 5.3E-05            | 6.2E-07                   | 2.7E-15            | 8.6E-04            | 4.8E-06            | 2.1E-14            | 6.6E-03            | 1.7E-06            | 7.3E-15            | 2.3E-03            |
| <b>BDE-153</b> | 2.3E-05            | 1.0E-13            | 3.2E-02            | 1.9E-07            | 8.5E-16            | 2.7E-04            | 2.9E-06                   | 1.3E-14            | 4.0E-03            | 1.3E-05            | 5.6E-14            | 1.8E-02            | 4.8E-06            | 2.1E-14            | 6.6E-03            |
| <b>BDE-138</b> | 1.3E-06            | 5.9E-15            | 1.9E-03            | 0.0E+00            | 0.0E+00            | 0.0E+00            | 1.7E-07                   | 7.3E-16            | 2.3E-04            | 6.6E-07            | 2.9E-15            | 9.2E-04            | 4.0E-07            | 1.8E-15            | 5.6E-04            |
| <b>BDE-183</b> | 1.5E-05            | 6.6E-14            | 2.1E-02            | 4.6E-07            | 2.0E-15            | 6.4E-04            | 5.6E-06                   | 2.4E-14            | 7.7E-03            | 6.4E-06            | 2.8E-14            | 8.9E-03            | 6.0E-06            | 2.6E-14            | 8.3E-03            |
| <b>BDE-190</b> | 1.2E-05            | 5.5E-14            | 1.7E-02            | 3.8E-08            | 1.7E-16            | 5.3E-05            | 5.8E-07                   | 2.5E-15            | 8.0E-04            | 1.0E-06            | 4.4E-15            | 1.4E-03            | 1.9E-06            | 8.3E-15            | 2.6E-03            |
| <b>BDE-208</b> | 6.7E-05            | 2.9E-13            | 9.2E-02            | 4.6E-07            | 2.0E-15            | 6.4E-04            | 9.5E-06                   | 4.2E-14            | 1.3E-02            | 5.4E-06            | 2.4E-14            | 7.5E-03            | 9.7E-06            | 4.3E-14            | 1.3E-02            |
| <b>BDE-207</b> | 1.4E-04            | 6.2E-13            | 2.0E-01            | 7.3E-07            | 3.2E-15            | 1.0E-03            | 3.0E-05                   | 1.3E-13            | 4.2E-02            | 1.2E-05            | 5.4E-14            | 1.7E-02            | 1.6E-05            | 7.1E-14            | 2.2E-02            |
| <b>BDE-206</b> | 4.6E-05            | 2.0E-13            | 6.4E-02            | 1.5E-07            | 6.8E-16            | 2.1E-04            | 2.5E-05                   | 1.1E-13            | 3.5E-02            | 1.2E-05            | 5.4E-14            | 1.7E-02            | 1.3E-05            | 5.7E-14            | 1.8E-02            |
| <b>BDE-209</b> | 2.2E-03            | 9.9E-12            | 3.1E+00            | 5.0E-06            | 2.2E-14            | 6.9E-03            | 3.1E-03                   | 1.4E-11            | 4.3E+00            | 1.2E-02            | 5.4E-11            | 1.7E+01            | 5.6E-04            | 2.5E-12            | 7.8E-01            |
| <b>ΣPBDE</b>   | <b>2.7E-03</b>     | <b>1.2E-11</b>     | <b>3.7E+00</b>     | <b>7.6E-06</b>     | <b>3.3E-14</b>     | <b>1.0E-02</b>     | <b>3.2E-03</b>            | <b>1.4E-11</b>     | <b>4.4E+00</b>     | <b>1.2E-02</b>     | <b>5.5E-11</b>     | <b>1.7E+01</b>     | <b>6.4E-04</b>     | <b>2.8E-12</b>     | <b>8.9E-01</b>     |

Supplementary table 9. PBDEs: Estimation of Average Daily dose (ADD) via ingestion, inhalation, and dermal uptake via soil and dust at various e-waste sites and in Aba

| PBDE           | Top Soil 0-10cm    |                    |                    | Floor dust (control soil) |                    |                    | Roadside dust      |                    |                    |
|----------------|--------------------|--------------------|--------------------|---------------------------|--------------------|--------------------|--------------------|--------------------|--------------------|
|                | Burning sites      |                    |                    | Repair sites              |                    |                    | Repair sites       |                    |                    |
|                | ADD <sub>ing</sub> | ADD <sub>inh</sub> | ADD <sub>der</sub> | ADD <sub>ing</sub>        | ADD <sub>inh</sub> | ADD <sub>der</sub> | ADD <sub>ing</sub> | ADD <sub>inh</sub> | ADD <sub>der</sub> |
| <b>BDE-17</b>  | 2.5E-07            | 1.1E-15            | 3.5E-04            | 1.2E-08                   | 5.1E-17            | 1.6E-05            | 1.2E-07            | 5.3E-16            | 1.7E-04            |
| <b>BDE-28</b>  | 8.8E-07            | 3.9E-15            | 1.2E-03            | 6.1E-08                   | 2.7E-16            | 8.5E-05            | 5.5E-07            | 2.4E-15            | 7.7E-04            |
| <b>BDE-71</b>  | 2.2E-06            | 9.5E-15            | 3.0E-03            | 2.8E-07                   | 1.2E-15            | 3.9E-04            | 1.3E-06            | 5.7E-15            | 1.8E-03            |
| <b>BDE-47</b>  | 2.2E-06            | 9.5E-15            | 3.0E-03            | 5.5E-07                   | 2.4E-15            | 7.6E-04            | 1.5E-06            | 6.6E-15            | 2.1E-03            |
| <b>BDE-66</b>  | 8.8E-07            | 3.9E-15            | 1.2E-03            | 7.7E-08                   | 3.4E-16            | 1.1E-04            | 6.1E-07            | 2.7E-15            | 8.5E-04            |
| <b>BDE-100</b> | 6.3E-07            | 2.8E-15            | 8.7E-04            | 1.5E-07                   | 6.4E-16            | 2.0E-04            | 2.3E-07            | 1.0E-15            | 3.2E-04            |
| <b>BDE-99</b>  | 4.5E-06            | 2.0E-14            | 6.2E-03            | 9.8E-07                   | 4.3E-15            | 1.4E-03            | 2.2E-06            | 9.9E-15            | 3.1E-03            |
| <b>BDE-85</b>  | 1.9E-06            | 8.2E-15            | 2.6E-03            | 5.0E-08                   | 2.2E-16            | 6.9E-05            | 0.0E+00            | 0.0E+00            | 0.0E+00            |
| <b>BDE-154</b> | 3.0E-06            | 1.3E-14            | 4.1E-03            | 1.7E-07                   | 7.3E-16            | 2.3E-04            | 9.4E-07            | 4.2E-15            | 1.3E-03            |
| <b>BDE-153</b> | 7.9E-06            | 3.5E-14            | 1.1E-02            | 6.1E-07                   | 2.7E-15            | 8.5E-04            | 3.0E-06            | 1.3E-14            | 4.2E-03            |
| <b>BDE-138</b> | 6.1E-07            | 2.7E-15            | 8.5E-04            | 3.8E-08                   | 1.7E-16            | 5.3E-05            | 2.1E-07            | 9.1E-16            | 2.9E-04            |
| <b>BDE-183</b> | 5.1E-06            | 2.3E-14            | 7.1E-03            | 3.3E-06                   | 1.5E-14            | 4.6E-03            | 1.8E-06            | 7.7E-15            | 2.4E-03            |
| <b>BDE-190</b> | 2.9E-06            | 1.3E-14            | 4.0E-03            | 1.4E-07                   | 6.3E-16            | 2.0E-04            | 1.1E-06            | 4.8E-15            | 1.5E-03            |
| <b>BDE-208</b> | 1.7E-06            | 7.5E-15            | 2.3E-03            | 1.3E-06                   | 5.8E-15            | 1.8E-03            | 9.9E-07            | 4.4E-15            | 1.4E-03            |
| <b>BDE-207</b> | 3.4E-06            | 1.5E-14            | 4.7E-03            | 3.8E-06                   | 1.7E-14            | 5.3E-03            | 1.3E-06            | 5.9E-15            | 1.8E-03            |
| <b>BDE-206</b> | 1.4E-06            | 6.1E-15            | 1.9E-03            | 2.3E-06                   | 1.0E-14            | 3.2E-03            | 8.3E-07            | 3.6E-15            | 1.1E-03            |
| <b>BDE-209</b> | 4.0E-05            | 1.7E-13            | 5.5E-02            | 2.1E-04                   | 9.0E-13            | 2.8E-01            | 2.6E-05            | 1.2E-13            | 3.7E-02            |
| <b>ΣPBDE</b>   | <b>7.9E-05</b>     | <b>3.5E-13</b>     | <b>1.1E-01</b>     | <b>2.2E-04</b>            | <b>9.7E-13</b>     | <b>3.0E-01</b>     | <b>4.3E-05</b>     | <b>1.9E-13</b>     | <b>6.0E-02</b>     |

Supplementary table 10. Metal: Estimation of Average Daily dose (ADD) via ingestion, inhalation, and dermal uptake via soil and dust at various e-waste sites and in Lagos

| Metals | Top Soil 0-10cm    |                    |                    |                    |                    |                    |                    |                    |                    | Floor dust (control soil) |                    |                    |                    |                    |                    | Roadside dust      |                    |                    |
|--------|--------------------|--------------------|--------------------|--------------------|--------------------|--------------------|--------------------|--------------------|--------------------|---------------------------|--------------------|--------------------|--------------------|--------------------|--------------------|--------------------|--------------------|--------------------|
|        | Burning sites      |                    |                    | Dismantling sites  |                    |                    | Repair sites       |                    |                    | Dismantling sites         |                    |                    | Repair sites       |                    |                    | Dismantling sites  |                    |                    |
|        | ADD <sub>ing</sub> | ADD <sub>inh</sub> | ADD <sub>der</sub> | ADD <sub>ing</sub> | ADD <sub>inh</sub> | ADD <sub>der</sub> | ADD <sub>ing</sub> | ADD <sub>inh</sub> | ADD <sub>der</sub> | ADD <sub>ing</sub>        | ADD <sub>inh</sub> | ADD <sub>der</sub> | ADD <sub>ing</sub> | ADD <sub>inh</sub> | ADD <sub>der</sub> | ADD <sub>ing</sub> | ADD <sub>inh</sub> | ADD <sub>der</sub> |
| V      | 9.3E-06            | 4.1E-14            | 1.3E-02            | 2.0E-05            | 8.6E-14            | 2.7E-02            | 3.9E-06            | 1.7E-14            | 5.4E-03            | 1.5E-05                   | 6.4E-14            | 2.0E-02            | 1.0E-05            | 4.4E-14            | 1.4E-02            | 1.3E-05            | 5.9E-14            | 1.9E-02            |
| Cr     | 2.6E-05            | 1.2E-13            | 3.7E-02            | 4.0E-05            | 1.7E-13            | 5.5E-02            | 1.9E-05            | 8.4E-14            | 2.6E-02            | 3.0E-05                   | 1.3E-13            | 4.2E-02            | 2.2E-05            | 9.7E-14            | 3.0E-02            | 2.4E-05            | 1.1E-13            | 3.3E-02            |
| Mn     | 6.1E-05            | 2.7E-13            | 8.5E-02            | 2.7E-04            | 1.2E-12            | 3.7E-01            | 3.1E-05            | 1.4E-13            | 4.3E-02            | 2.6E-04                   | 1.2E-12            | 3.6E-01            | 1.2E-04            | 5.1E-13            | 1.6E-01            | 1.6E-04            | 7.2E-13            | 2.3E-01            |
| Co     | 5.8E-07            | 2.5E-15            | 8.0E-04            | 9.7E-07            | 4.3E-15            | 1.3E-03            | 5.8E-07            | 2.5E-15            | 8.0E-04            | 5.8E-07                   | 2.5E-15            | 8.0E-04            | 5.8E-07            | 2.5E-15            | 8.0E-04            | 1.1E-06            | 4.7E-15            | 1.5E-03            |
| Ni     | 7.5E-05            | 3.3E-13            | 1.0E-01            | 1.9E-05            | 8.4E-14            | 2.6E-02            | 3.8E-05            | 1.7E-13            | 5.3E-02            | 3.8E-05                   | 1.7E-13            | 5.3E-02            | 1.1E-05            | 4.7E-14            | 1.5E-02            | 3.2E-05            | 1.4E-13            | 4.4E-02            |
| Cu     | 4.8E-03            | 2.1E-11            | 6.7E+00            | 2.9E-04            | 1.3E-12            | 4.0E-01            | 1.1E-05            | 4.7E-14            | 1.5E-02            | 2.9E-04                   | 1.3E-12            | 4.1E-01            | 3.1E-05            | 1.4E-13            | 4.4E-02            | 9.1E-05            | 4.0E-13            | 1.3E-01            |
| Zn     | 1.2E-03            | 5.3E-12            | 1.7E+00            | 3.1E-04            | 1.4E-12            | 4.3E-01            | 9.4E-06            | 4.2E-14            | 1.3E-02            | 5.2E-04                   | 2.3E-12            | 7.1E-01            | 1.2E-04            | 5.3E-13            | 1.7E-01            | 3.5E-04            | 1.6E-12            | 4.9E-01            |
| Ga     | 5.6E-07            | 2.5E-15            | 7.7E-04            | 5.9E-06            | 2.6E-14            | 8.2E-03            | 1.5E-06            | 6.8E-15            | 2.1E-03            | 3.0E-06                   | 1.3E-14            | 4.2E-03            | 1.5E-06            | 6.8E-15            | 2.1E-03            | 2.2E-06            | 9.8E-15            | 3.1E-03            |
| Ge     | 9.6E-08            | 4.2E-16            | 1.3E-04            | 1.7E-07            | 7.3E-16            | 2.3E-04            | 3.1E-07            | 1.4E-15            | 4.3E-04            | 2.3E-07                   | 1.0E-15            | 3.2E-04            | 9.6E-08            | 4.2E-16            | 1.3E-04            | 8.1E-07            | 3.6E-15            | 1.1E-03            |
| As     | 3.2E-05            | 1.4E-13            | 1.3E-02            | 1.9E-06            | 8.4E-15            | 7.9E-04            | 1.4E-06            | 6.1E-15            | 5.8E-04            | 2.2E-06                   | 9.7E-15            | 9.1E-04            | 9.6E-08            | 4.2E-16            | 4.0E-05            | 5.0E-06            | 2.2E-14            | 2.1E-03            |
| Se     | 2.3E-06            | 1.0E-14            | 3.2E-03            | 7.7E-08            | 3.4E-16            | 1.1E-04            | 9.6E-08            | 4.2E-16            | 1.3E-04            | 2.5E-07                   | 1.1E-15            | 3.5E-04            | 9.6E-08            | 4.2E-16            | 1.3E-04            | 2.3E-07            | 1.0E-15            | 3.2E-04            |
| Mo     | 3.3E-06            | 1.4E-14            | 4.5E-03            | 1.9E-07            | 8.5E-16            | 2.7E-04            | 5.8E-07            | 2.5E-15            | 8.0E-04            | 1.9E-07                   | 8.5E-16            | 2.7E-04            | 1.9E-07            | 8.5E-16            | 2.7E-04            | 1.9E-07            | 8.5E-16            | 2.7E-04            |
| Ag     | 1.6E-05            | 7.0E-14            | 2.2E-02            | 2.1E-06            | 9.3E-15            | 2.9E-03            | 3.8E-07            | 1.7E-15            | 5.3E-04            | 1.3E-05                   | 5.8E-14            | 1.8E-02            | 5.0E-07            | 2.2E-15            | 6.9E-04            | 3.0E-06            | 1.3E-14            | 4.1E-03            |
| Cd     | 4.0E-06            | 1.8E-14            | 5.5E-05            | 9.8E-07            | 4.3E-15            | 1.4E-05            | 9.8E-07            | 4.3E-15            | 1.4E-05            | 9.8E-07                   | 4.3E-15            | 1.4E-05            | 9.8E-07            | 4.3E-15            | 1.4E-05            | 9.8E-07            | 4.3E-15            | 1.4E-05            |
| Sn     | 1.0E-03            | 4.6E-12            | 1.4E+00            | 2.0E-05            | 9.0E-14            | 2.8E-02            | 1.1E-06            | 4.7E-15            | 1.5E-03            | 1.3E-04                   | 5.9E-13            | 1.9E-01            | 4.1E-05            | 1.8E-13            | 5.6E-02            | 2.4E-05            | 1.1E-13            | 3.4E-02            |
| Sb     | 5.9E-04            | 2.6E-12            | 8.2E-01            | 8.6E-06            | 3.8E-14            | 1.2E-02            | 5.8E-07            | 2.5E-15            | 8.0E-04            | 1.7E-05                   | 7.3E-14            | 2.3E-02            | 1.5E-06            | 6.8E-15            | 2.1E-03            | 5.4E-06            | 2.4E-14            | 7.5E-03            |
| Te     | 5.8E-07            | 2.5E-15            | 8.0E-04            | 5.8E-07            | 2.5E-15            | 8.0E-04            | 5.8E-07            | 2.5E-15            | 8.0E-04            | 5.8E-07                   | 2.5E-15            | 8.0E-04            | 5.8E-07            | 2.5E-15            | 8.0E-04            | 5.8E-07            | 2.5E-15            | 8.0E-04            |
| Ba     | 5.3E-04            | 2.3E-12            | 7.3E-01            | 9.8E-05            | 4.3E-13            | 1.4E-01            | 4.1E-05            | 1.8E-13            | 5.7E-02            | 2.7E-04                   | 1.2E-12            | 3.8E-01            | 8.7E-05            | 3.8E-13            | 1.2E-01            | 1.9E-04            | 8.4E-13            | 2.7E-01            |
| Hg     | 1.9E-07            | 8.5E-16            | 2.7E-04            | 9.4E-07            | 4.2E-15            | 1.3E-03            | 1.9E-07            | 8.5E-16            | 2.7E-04            | 8.8E-07                   | 3.9E-15            | 1.2E-03            | 1.9E-07            | 8.5E-16            | 2.7E-04            | 6.9E-08            | 3.0E-16            | 9.6E-05            |
| Tl     | 1.9E-07            | 8.5E-16            | 2.7E-04            | 2.3E-07            | 1.0E-15            | 3.2E-04            | 1.9E-07            | 8.5E-16            | 2.7E-04            | 1.9E-07                   | 8.5E-16            | 2.7E-04            | 1.9E-07            | 8.5E-16            | 2.7E-04            | 2.9E-07            | 1.3E-15            | 4.0E-04            |
| Pb     | 2.4E-03            | 1.1E-11            | 3.4E+00            | 7.6E-05            | 3.4E-13            | 1.1E-01            | 4.7E-06            | 2.1E-14            | 6.5E-03            | 1.1E-04                   | 4.7E-13            | 1.5E-01            | 2.2E-05            | 9.7E-14            | 3.0E-02            | 1.4E-04            | 6.3E-13            | 2.0E-01            |
| Ta     | 1.9E-07            | 8.5E-16            | 2.7E-04            | 7.6E-06            | 3.4E-14            | 1.1E-02            | 6.9E-06            | 3.0E-14            | 9.6E-03            | 2.3E-06                   | 1.0E-14            | 3.2E-03            | 6.3E-06            | 2.8E-14            | 8.7E-03            | 8.1E-06            | 3.6E-14            | 1.1E-02            |
| Fe     | 2.8E-03            | 1.2E-11            | 3.9E+00            | 1.2E-02            | 5.3E-11            | 1.7E+01            | 4.2E-03            | 1.9E-11            | 5.9E+00            | 1.3E-02                   | 5.6E-11            | 1.8E+01            | 6.4E-03            | 2.8E-11            | 8.8E+00            | 9.5E-03            | 4.2E-11            | 1.3E+01            |
| Ti     | 1.7E-03            | 7.7E-12            | 2.4E+00            | 3.0E-03            | 1.3E-11            | 4.2E+00            | 2.0E-03            | 8.7E-12            | 2.7E+00            | 1.8E-03                   | 8.0E-12            | 2.5E+00            | 1.2E-03            | 5.2E-12            | 1.6E+00            | 1.7E-03            | 7.7E-12            | 2.4E+00            |

Supplementary table 11. Metal: Average Daily dose (ADD) via ingestion, inhalation, and dermal uptake via soil and dust at various e-waste sites and in Ibadan

| Metals | Top Soil 0-10cm    |                    |                    |                    |                    |                    | Floor dust (control soil) |                    |                    | Direct dust        |                    |                    |                    |                    |                    |
|--------|--------------------|--------------------|--------------------|--------------------|--------------------|--------------------|---------------------------|--------------------|--------------------|--------------------|--------------------|--------------------|--------------------|--------------------|--------------------|
|        | Burning sites      |                    |                    | Dismantling sites  |                    |                    | Repair sites              |                    |                    | Dismantling sites  |                    |                    | Repair sites       |                    |                    |
|        | ADD <sub>ing</sub> | ADD <sub>inh</sub> | ADD <sub>der</sub> | ADD <sub>ing</sub> | ADD <sub>inh</sub> | ADD <sub>der</sub> | ADD <sub>ing</sub>        | ADD <sub>inh</sub> | ADD <sub>der</sub> | ADD <sub>ing</sub> | ADD <sub>inh</sub> | ADD <sub>der</sub> | ADD <sub>ing</sub> | ADD <sub>inh</sub> | ADD <sub>der</sub> |
| V      | 2.1E-05            | 9.1E-14            | 2.9E-02            | 2.1E-05            | 9.4E-14            | 2.9E-02            | 2.5E-05                   | 1.1E-13            | 3.5E-02            | 3.5E-04            | 1.6E-12            | 4.9E-01            | 4.3E-05            | 1.9E-13            | 5.9E-02            |
| Cr     | 4.7E-05            | 2.1E-13            | 6.6E-02            | 4.0E-05            | 1.8E-13            | 5.6E-02            | 4.6E-05                   | 2.0E-13            | 6.4E-02            | 5.5E-06            | 2.4E-14            | 7.6E-03            | 5.4E-05            | 2.4E-13            | 7.5E-02            |
| Mn     | 2.8E-04            | 1.3E-12            | 3.9E-01            | 2.2E-04            | 9.5E-13            | 3.0E-01            | 2.9E-04                   | 1.3E-12            | 4.0E-01            | 6.2E-04            | 2.7E-12            | 8.6E-01            | 3.1E-04            | 1.4E-12            | 4.2E-01            |
| Co     | 5.8E-07            | 2.5E-15            | 8.0E-04            | 5.8E-07            | 2.5E-15            | 8.0E-04            | 5.8E-07                   | 2.5E-15            | 8.0E-04            | 2.8E-05            | 1.2E-13            | 3.9E-02            | 5.8E-07            | 2.5E-15            | 8.0E-04            |
| Ni     | 3.6E-05            | 1.6E-13            | 5.0E-02            | 2.5E-05            | 1.1E-13            | 3.5E-02            | 1.7E-05                   | 7.3E-14            | 2.3E-02            | 1.2E-04            | 5.4E-13            | 1.7E-01            | 3.0E-05            | 1.3E-13            | 4.2E-02            |
| Cu     | 4.9E-03            | 2.2E-11            | 6.8E+00            | 5.2E-04            | 2.3E-12            | 7.2E-01            | 1.2E-04                   | 5.5E-13            | 1.7E-01            | 1.6E-05            | 7.1E-14            | 2.2E-02            | 1.2E-04            | 5.4E-13            | 1.7E-01            |
| Zn     | 1.3E-03            | 5.6E-12            | 1.8E+00            | 7.0E-04            | 3.1E-12            | 9.7E-01            | 4.4E-04                   | 2.0E-12            | 6.1E-01            | 4.7E-05            | 2.1E-13            | 6.5E-02            | 9.5E-04            | 4.2E-12            | 1.3E+00            |
| Ga     | 2.0E-06            | 8.8E-15            | 2.8E-03            | 3.8E-06            | 1.7E-14            | 5.3E-03            | 1.2E-06                   | 5.1E-15            | 1.6E-03            | 8.1E-06            | 3.6E-14            | 1.1E-02            | 2.9E-06            | 1.3E-14            | 4.0E-03            |
| Ge     | 9.6E-08            | 4.2E-16            | 1.3E-04            | 9.6E-08            | 4.2E-16            | 1.3E-04            | 2.3E-07                   | 1.0E-15            | 3.2E-04            | 3.8E-07            | 1.7E-15            | 5.3E-04            | 2.8E-07            | 1.2E-15            | 3.9E-04            |
| As     | 4.0E-05            | 1.7E-13            | 1.6E-02            | 4.0E-06            | 1.7E-14            | 1.6E-03            | 9.6E-08                   | 4.2E-16            | 4.0E-05            | 4.6E-07            | 2.0E-15            | 1.9E-04            | 1.9E-06            | 8.5E-15            | 8.0E-04            |
| Se     | 1.0E-05            | 4.4E-14            | 1.4E-02            | 1.7E-06            | 7.5E-15            | 2.3E-03            | 3.8E-07                   | 1.7E-15            | 5.3E-04            | 9.6E-08            | 4.2E-16            | 1.3E-04            | 3.5E-07            | 1.5E-15            | 4.8E-04            |
| Mo     | 3.1E-06            | 1.4E-14            | 4.3E-03            | 2.8E-06            | 1.2E-14            | 3.8E-03            | 2.3E-07                   | 1.0E-15            | 3.2E-04            | 5.0E-07            | 2.2E-15            | 6.9E-04            | 1.0E-06            | 4.6E-15            | 1.4E-03            |
| Ag     | 6.1E-06            | 2.7E-14            | 8.5E-03            | 3.3E-06            | 1.4E-14            | 4.5E-03            | 2.1E-06                   | 9.3E-15            | 2.9E-03            | 5.2E-07            | 2.3E-15            | 7.2E-04            | 5.8E-06            | 2.5E-14            | 8.0E-03            |
| Cd     | 2.7E-06            | 1.2E-14            | 3.7E-05            | 9.8E-07            | 4.3E-15            | 1.4E-05            | 9.8E-07                   | 4.3E-15            | 1.4E-05            | 9.8E-07            | 4.3E-15            | 1.4E-05            | 1.0E-06            | 4.6E-15            | 1.4E-05            |
| Sn     | 4.7E-04            | 2.1E-12            | 6.5E-01            | 4.5E-05            | 2.0E-13            | 6.3E-02            | 3.7E-04                   | 1.6E-12            | 5.2E-01            | 5.8E-07            | 2.5E-15            | 8.0E-04            | 2.0E-05            | 9.0E-14            | 2.8E-02            |
| Sb     | 2.3E-04            | 1.0E-12            | 3.2E-01            | 2.0E-05            | 8.8E-14            | 2.8E-02            | 7.7E-06                   | 3.4E-14            | 1.1E-02            | 5.8E-07            | 2.5E-15            | 8.0E-04            | 1.8E-05            | 8.1E-14            | 2.6E-02            |
| Te     | 5.8E-07            | 2.5E-15            | 8.0E-04            | 5.8E-07            | 2.5E-15            | 8.0E-04            | 5.8E-07                   | 2.5E-15            | 8.0E-04            | 5.8E-07            | 2.5E-15            | 8.0E-04            | 5.8E-07            | 2.5E-15            | 8.0E-04            |
| Ba     | 3.6E-04            | 1.6E-12            | 5.0E-01            | 2.3E-04            | 1.0E-12            | 3.1E-01            | 1.8E-04                   | 7.9E-13            | 2.5E-01            | 3.5E-05            | 1.5E-13            | 4.8E-02            | 4.0E-04            | 1.8E-12            | 5.6E-01            |
| Hg     | 1.8E-06            | 7.8E-15            | 2.4E-03            | 5.0E-07            | 2.2E-15            | 6.9E-04            | 2.7E-07                   | 1.2E-15            | 3.7E-04            | 1.9E-07            | 8.5E-16            | 2.7E-04            | 1.0E-06            | 4.6E-15            | 1.4E-03            |
| Tl     | 3.8E-06            | 1.7E-14            | 5.3E-03            | 3.1E-07            | 1.4E-15            | 4.3E-04            | 2.7E-07                   | 1.2E-15            | 3.7E-04            | 1.9E-07            | 8.5E-16            | 2.7E-04            | 8.6E-07            | 3.8E-15            | 1.2E-03            |
| Pb     | 8.2E-03            | 3.6E-11            | 1.1E+01            | 9.4E-04            | 4.2E-12            | 1.3E+00            | 3.6E-04                   | 1.6E-12            | 5.1E-01            | 1.9E-07            | 8.5E-16            | 2.7E-04            | 1.7E-04            | 7.6E-13            | 2.4E-01            |
| Ta     | 1.9E-07            | 8.5E-16            | 2.7E-04            | 5.4E-06            | 2.4E-14            | 7.5E-03            | 6.1E-06                   | 2.7E-14            | 8.5E-03            | 6.9E-06            | 3.0E-14            | 9.6E-03            | 1.4E-05            | 6.1E-14            | 1.9E-02            |
| Fe     | 1.2E-02            | 5.3E-11            | 1.7E+01            | 1.9E-02            | 8.5E-11            | 2.7E+01            | 1.6E-02                   | 7.2E-11            | 2.3E+01            | 6.7E-02            | 3.0E-10            | 9.3E+01            | 2.2E-02            | 9.7E-11            | 3.1E+01            |
| Ti     | 2.5E-03            | 1.1E-11            | 3.5E+00            | 1.8E-03            | 7.9E-12            | 2.5E+00            | 1.3E-03                   | 5.9E-12            | 1.9E+00            | 2.0E-02            | 9.0E-11            | 2.8E+01            | 1.9E-03            | 8.4E-12            | 2.6E+00            |
|        |                    |                    |                    |                    |                    |                    |                           |                    |                    |                    |                    |                    |                    |                    |                    |

Supplementary table 12. Metal: Average Daily dose (ADD) via ingestion, inhalation, and dermal uptake via soil and dust at various e-waste sites and in Aba

| Metals | Top Soil 0-10cm    |                    |                    |                    |                    |                    | Floor dust         |                    |                    |                    |                    |                    | Roadside dust      |                    |                    |
|--------|--------------------|--------------------|--------------------|--------------------|--------------------|--------------------|--------------------|--------------------|--------------------|--------------------|--------------------|--------------------|--------------------|--------------------|--------------------|
|        | Burning sites      |                    |                    | Dismantling sites  |                    |                    | Dismantling sites  |                    |                    | Repair sites       |                    |                    |                    |                    |                    |
|        | ADD <sub>ing</sub> | ADD <sub>inh</sub> | ADD <sub>der</sub> | ADD <sub>ing</sub> | ADD <sub>inh</sub> | ADD <sub>der</sub> | ADD <sub>ing</sub> | ADD <sub>inh</sub> | ADD <sub>der</sub> | ADD <sub>ing</sub> | ADD <sub>inh</sub> | ADD <sub>der</sub> | ADD <sub>ing</sub> | ADD <sub>inh</sub> | ADD <sub>der</sub> |
| V      | 1.1E-05            | 4.7E-14            | 1.5E-02            | 1.8E-05            | 7.8E-14            | 2.4E-02            | 1.0E-05            | 4.4E-14            | 1.4E-02            | 6.5E-06            | 2.9E-14            | 9.1E-03            | 1.6E-05            | 7.1E-14            | 2.2E-02            |
| Cr     | 3.9E-05            | 1.7E-13            | 5.4E-02            | 7.6E-05            | 3.3E-13            | 1.0E-01            | 7.2E-05            | 3.2E-13            | 1.0E-01            | 1.6E-05            | 7.1E-14            | 2.2E-02            | 1.2E-05            | 5.1E-14            | 1.6E-02            |
| Mn     | 1.6E-04            | 7.1E-13            | 2.2E-01            | 2.1E-04            | 9.1E-13            | 2.9E-01            | 2.5E-04            | 1.1E-12            | 3.5E-01            | 1.2E-04            | 5.2E-13            | 1.6E-01            | 1.1E-04            | 4.6E-13            | 1.5E-01            |
| Co     | 5.8E-07            | 2.5E-15            | 8.0E-04            | 5.8E-07            | 2.5E-15            | 8.0E-04            | 5.8E-07            | 2.5E-15            | 8.0E-04            | 5.8E-07            | 2.5E-15            | 8.0E-04            | 5.8E-07            | 2.5E-15            | 8.0E-04            |
| Ni     | 3.3E-05            | 1.5E-13            | 4.6E-02            | 5.9E-05            | 2.6E-13            | 8.1E-02            | 5.7E-05            | 2.5E-13            | 7.9E-02            | 8.8E-06            | 3.9E-14            | 1.2E-02            | 6.1E-06            | 2.7E-14            | 8.5E-03            |
| Cu     | 1.7E-03            | 7.5E-12            | 2.4E+00            | 3.0E-03            | 1.3E-11            | 4.2E+00            | 5.2E-03            | 2.3E-11            | 7.2E+00            | 7.3E-05            | 3.2E-13            | 1.0E-01            | 8.8E-06            | 3.9E-14            | 1.2E-02            |
| Zn     | 1.4E-03            | 6.0E-12            | 1.9E+00            | 2.2E-03            | 9.6E-12            | 3.0E+00            | 2.1E-03            | 9.1E-12            | 2.9E+00            | 1.8E-04            | 8.0E-13            | 2.5E-01            | 4.6E-05            | 2.0E-13            | 6.3E-02            |
| Ga     | 3.8E-06            | 1.7E-14            | 5.3E-03            | 5.6E-06            | 2.5E-14            | 7.7E-03            | 5.8E-06            | 2.5E-14            | 8.0E-03            | 6.9E-07            | 3.0E-15            | 9.6E-04            | 1.8E-06            | 8.0E-15            | 2.5E-03            |
| Ge     | 2.7E-07            | 1.2E-15            | 3.7E-04            | 9.6E-08            | 4.2E-16            | 1.3E-04            | 9.6E-08            | 4.2E-16            | 1.3E-04            | 9.6E-08            | 4.2E-16            | 1.3E-04            | 9.6E-08            | 4.2E-16            | 1.3E-04            |
| As     | 9.2E-06            | 4.1E-14            | 3.8E-03            | 1.5E-05            | 6.8E-14            | 6.4E-03            | 2.7E-05            | 1.2E-13            | 1.1E-02            | 9.6E-08            | 4.2E-16            | 4.0E-05            | 9.6E-08            | 4.2E-16            | 4.0E-05            |
| Se     | 9.6E-07            | 4.2E-15            | 1.3E-03            | 4.4E-06            | 1.9E-14            | 6.1E-03            | 1.5E-06            | 6.8E-15            | 2.1E-03            | 9.6E-08            | 4.2E-16            | 1.3E-04            | 9.6E-08            | 4.2E-16            | 1.3E-04            |
| Mo     | 5.4E-06            | 2.4E-14            | 7.5E-03            | 6.5E-06            | 2.9E-14            | 9.1E-03            | 6.7E-06            | 3.0E-14            | 9.3E-03            | 1.9E-07            | 8.5E-16            | 2.7E-04            | 1.9E-07            | 8.5E-16            | 2.7E-04            |
| Ag     | 3.1E-06            | 1.4E-14            | 4.3E-03            | 5.6E-06            | 2.5E-14            | 7.7E-03            | 1.5E-05            | 6.8E-14            | 2.1E-02            | 3.8E-07            | 1.7E-15            | 5.3E-04            | 3.8E-07            | 1.7E-15            | 5.3E-04            |
| Cd     | 1.9E-07            | 8.5E-16            | 2.7E-04            | 9.2E-06            | 4.1E-14            | 1.3E-02            | 1.2E-05            | 5.1E-14            | 1.6E-02            | 9.8E-07            | 4.3E-15            | 1.4E-03            | 9.8E-07            | 4.3E-15            | 1.4E-03            |
| Sn     | 3.1E-05            | 1.4E-13            | 4.3E-02            | 9.1E-05            | 4.0E-13            | 1.3E-01            | 2.8E-04            | 1.3E-12            | 3.9E-01            | 1.3E-04            | 5.7E-13            | 1.8E-01            | 2.1E-06            | 9.3E-15            | 2.9E-03            |
| Sb     | 1.9E-05            | 8.3E-14            | 2.6E-02            | 7.8E-05            | 3.4E-13            | 1.1E-01            | 1.5E-04            | 6.5E-13            | 2.0E-01            | 3.8E-06            | 1.7E-14            | 5.3E-03            | 4.2E-07            | 1.9E-15            | 5.9E-04            |
| Te     | 5.8E-07            | 2.5E-15            | 8.0E-04            | 5.8E-07            | 2.5E-15            | 8.0E-04            | 5.8E-07            | 2.5E-15            | 8.0E-04            | 5.8E-07            | 2.5E-15            | 8.0E-04            | 5.8E-07            | 2.5E-15            | 8.0E-04            |
| Ba     | 3.7E-04            | 1.6E-12            | 5.2E-01            | 1.5E-03            | 6.6E-12            | 2.1E+00            | 3.8E-04            | 1.7E-12            | 5.3E-01            | 8.3E-05            | 3.6E-13            | 1.1E-01            | 6.5E-05            | 2.9E-13            | 9.1E-02            |
| Hg     | 1.9E-07            | 8.5E-16            | 2.7E-04            | 1.9E-07            | 8.5E-16            | 2.7E-04            | 1.9E-07            | 8.5E-16            | 2.7E-04            | 1.9E-07            | 8.5E-16            | 2.7E-04            | 3.8E-07            | 1.7E-15            | 5.3E-04            |
| Tl     | 1.9E-07            | 8.5E-16            | 2.7E-04            | 1.9E-07            | 8.5E-16            | 2.7E-04            | 1.9E-07            | 8.5E-16            | 2.7E-04            | 1.9E-07            | 8.5E-16            | 2.7E-04            | 1.9E-07            | 8.5E-16            | 2.7E-04            |
| Pb     | 5.8E-04            | 2.5E-12            | 8.0E-01            | 8.7E-04            | 3.8E-12            | 1.2E+00            | 1.4E-03            | 6.4E-12            | 2.0E+00            | 5.8E-05            | 2.5E-13            | 8.0E-02            | 1.3E-05            | 5.8E-14            | 1.8E-02            |
| Ta     | 1.9E-07            | 8.5E-16            | 2.7E-04            | 3.8E-07            | 1.7E-15            | 5.3E-04            | 3.8E-07            | 1.7E-15            | 5.3E-04            | 6.5E-06            | 2.9E-14            | 9.1E-03            | 1.0E-05            | 4.4E-14            | 1.4E-02            |
| Fe     | 2.0E-02            | 8.7E-11            | 2.7E+01            | 2.7E-02            | 1.2E-10            | 3.7E+01            | 3.7E-02            | 1.6E-10            | 5.2E+01            | 7.2E-03            | 3.2E-11            | 1.0E+01            | 6.8E-03            | 3.0E-11            | 9.5E+00            |
| Ti     | 2.2E-03            | 9.7E-12            | 3.1E+00            | 1.0E-03            | 4.4E-12            | 1.4E+00            | 1.9E-03            | 8.4E-12            | 2.6E+00            | 1.5E-03            | 6.5E-12            | 2.1E+00            | 2.1E-03            | 9.3E-12            | 2.9E+00            |
|        |                    |                    |                    |                    |                    |                    |                    |                    |                    |                    |                    |                    |                    |                    |                    |



**Supplementary table 13: Hazard Quotient (HQ) via ingestion, inhalation, and dermal uptake via soil and dust at various e-waste sites and in Lagos**

| PBDE           | RfD      | Top Soil 0-10cm   |                   |                   |                   |                   |                   |                   |                   |                   | Floor dust (control soil) |                   |                   |                   |                   |                            | Roadside dust              |                   |                       |
|----------------|----------|-------------------|-------------------|-------------------|-------------------|-------------------|-------------------|-------------------|-------------------|-------------------|---------------------------|-------------------|-------------------|-------------------|-------------------|----------------------------|----------------------------|-------------------|-----------------------|
|                |          | Burning sites     |                   |                   | Dismantling sites |                   |                   | Repair sites      |                   |                   | Dismantling sites         |                   |                   | Repair sites      |                   |                            | Dismantling sites          |                   |                       |
|                |          | HQ <sub>ing</sub> | HQ <sub>inh</sub> | HQ <sub>der</sub> | HQ <sub>ing</sub> | HQ <sub>inh</sub> | HQ <sub>der</sub> | HQ <sub>ing</sub> | HQ <sub>inh</sub> | HQ <sub>der</sub> | HQ <sub>ing</sub>         | HQ <sub>inh</sub> | HQ <sub>der</sub> | HQ <sub>ing</sub> | HQ <sub>inh</sub> | HQ <sub>der</sub>          | HQ <sub>ing</sub>          | HQ <sub>inh</sub> | HQ <sub>der</sub>     |
| <b>BDE-47</b>  | 1.00E-04 | 6.5E-05           |                   | 9.1E-02           | 1.41E-05          |                   | 2.0E-02           | 3.8E-07           |                   | 5.3E-04           | 2.42E-05                  |                   | 3.36E-02          | 2.07E-06          |                   | 2.88 <sup>E</sup> -03      | 3.08 <sup>E</sup> -05      |                   | 4.27 <sup>E</sup> -02 |
| <b>BDE-99</b>  | 1.00E-04 | 6.1E-04           |                   | 8.4E-01           | 4.16E-05          |                   | 5.8E-02           | 2.0E-06           |                   | 2.8E-03           | 5.80E-05                  |                   | 8.04E-02          | 6.91E-06          |                   | 9.59 <sup>E</sup> -03      | 7.30 <sup>E</sup> -05      |                   | 1.01E-01              |
| <b>BDE-153</b> | 2.00E-04 | 1.2E-04           |                   | 1.7E-01           | 1.91E-05          |                   | 2.6E-02           | 4.6E-01           |                   | 6.4E-04           | 1.71E-05                  |                   | 2.37E-02          | 3.65E-06          |                   | 5.06 <sup>E</sup> -03      | 1.57 <sup>E</sup> -05      |                   | 2.18E-02              |
| <b>BDE-209</b> | 7.00E-03 | 9.6E-04           |                   | 1.3E+00           | 8.18E-05          |                   | 1.1E-01           | 4.7E-07           |                   | 6.5E-05           | 1.65E-04                  |                   | 2.29E-01          | 2.37E-05          |                   | 3.29 <sup>E</sup> -02      | 5.27 <sup>E</sup> -05      |                   | 7.31E-02              |
| <b>ΣHQ=HI</b>  |          | <b>1.76E-03</b>   |                   | <b>2.4E+00</b>    | <b>1.57E-04</b>   |                   | <b>2.2E-01</b>    | <b>2.93E-06</b>   |                   | <b>4.06E-03</b>   | <b>2.64E-04</b>           |                   | <b>3.67E-01</b>   | <b>3.64E-05</b>   |                   | <b>5.04<sup>E</sup>-02</b> | <b>1.72<sup>E</sup>-04</b> |                   | <b>2.39E-01</b>       |

**Supplementary table 14: Hazard Quotient (HQ) via ingestion, inhalation, dermal uptake via soil and dust at various e-waste sites and in Ibadan**

| PBDE           | RfD      | Top Soil 0-10cm   |                   |                   |                   |                   |                   | Floor dust (control soil) |                   |                   | Direct dust       |                   |                   |                   |                   |                   |
|----------------|----------|-------------------|-------------------|-------------------|-------------------|-------------------|-------------------|---------------------------|-------------------|-------------------|-------------------|-------------------|-------------------|-------------------|-------------------|-------------------|
|                |          | Burning sites     |                   |                   | Dismantling sites |                   |                   | Repair sites              |                   |                   | Dismantling sites |                   |                   | Repair sites      |                   |                   |
|                |          | HQ <sub>ing</sub> | HQ <sub>inh</sub> | HQ <sub>der</sub> | HQ <sub>ing</sub> | HQ <sub>inh</sub> | HQ <sub>der</sub> | HQ <sub>ing</sub>         | HQ <sub>inh</sub> | HQ <sub>der</sub> | HQ <sub>ing</sub> | HQ <sub>inh</sub> | HQ <sub>der</sub> | HQ <sub>ing</sub> | HQ <sub>inh</sub> | HQ <sub>der</sub> |
| <b>BDE-47</b>  | 1.00E-04 | 3.2E-01           |                   | 4.4+02            | 7.7E-04           |                   | 1.1E+00           | 1.6E-02                   |                   | 2.2E+01           | 2.48E-01          |                   | 3.4E+02           | 5.61E-02          |                   | 7.8E+01           |
| <b>BDE-99</b>  | 1.00E-04 | 4.1E-01           |                   | 5.7E+02           | 1.6E-03           |                   | 2.2E+00           | 4.1E-02                   |                   | 5.7E+01           | 5.81E-01          |                   | 8.1E+02           | 9.87E-02          |                   | 1.4E+02           |
| <b>BDE-153</b> | 2.00E-04 | 1.2E-01           |                   | 1.6E+02           | 9.6E-04           |                   | 1.3E+00           | 1.4E-02                   |                   | 2.0E+01           | 6.35E-02          |                   | 8.8E+01           | 2.38E-02          |                   | 3.3E+01           |
| <b>BDE-209</b> | 7.00E-03 | 3.2E-01           |                   | 4.5E-02           | 7.1E-04           |                   | 9.9E-01           | 4.4E-01                   |                   | 6.1E+02           | 1.74E+00          |                   | 2.4E+03           | 8.03E-02          |                   | 1.1E+02           |
| <b>ΣHQ=HI</b>  |          | <b>1.2E+00</b>    |                   | <b>1.6E+03</b>    | <b>4.1E-03</b>    |                   | <b>5.6E+00</b>    | <b>5.1E-01</b>            |                   | <b>7.1E+02</b>    | <b>2.64E+00</b>   |                   | <b>3.7E+03</b>    | <b>2.59E-01</b>   |                   | <b>3.6E+02</b>    |

**Supplementary table 15: Hazard Quotient (HQ) via ingestion, inhalation, dermal uptake via soil and dust at various e-waste sites and in Aba**

| PBDE    | RfD      | Top Soil 0-10cm   |                  |                  | Floor dust (control soil) |                  |                  | Roadside dust     |                  |                  |
|---------|----------|-------------------|------------------|------------------|---------------------------|------------------|------------------|-------------------|------------------|------------------|
|         |          | Burning sites     |                  |                  | Repair sites              |                  |                  | Repair sites      |                  |                  |
|         |          | HQ <sub>ing</sub> | R <sub>ing</sub> | R <sub>der</sub> | HQ <sub>ing</sub>         | R <sub>ing</sub> | R <sub>der</sub> | HQ <sub>ing</sub> | R <sub>ing</sub> | R <sub>der</sub> |
| BDE-47  | 1.00E-04 | 2.2E-02           |                  | 3.0E+01          | 5.45E-03                  |                  | 7.6E+00          | 1.50E-02          |                  | 2.1E+01          |
| BDE-99  | 1.00E-04 | 4.5E-02           |                  | 6.2E+01          | 9.79E-03                  |                  | 1.4E+01          | 2.24E-02          |                  | 3.1E+01          |
| BDE-153 | 2.00E-04 | 4.0E-02           |                  | 5.5E+01          | 3.07E-03                  |                  | 4.3E+00          | 1.52E-02          |                  | 2.1E+01          |
| BDE-209 | 7.00E-03 | 5.7E-03           |                  | 7.9E+00          | 2.93E-02                  |                  | 4.1E+01          | 3.78E-03          |                  | 5.2E+00          |
| ΣHQ=HI  |          | 1.1E-01           |                  | 1.6E+02          | 4.76E-02                  |                  | 6.6E+01          | 5.64E-02          |                  | 7.8E+01          |

**Supplementary table 16: Total HI Estimate for PBDEs and Metals for non-cancer Effects (log transformed data)**

| Samples       | Location | Activity    | Ingestion | Inhalation | Dermal contact |
|---------------|----------|-------------|-----------|------------|----------------|
| Direct dust   | Ibadan   | Dismantling | -0.05     | -6         | 3.73           |
|               |          | Repair      | 0.18      | -6.89      | 3.6            |
| Floor dust    | Lagos    | Dismantling | -0.48     | -6.92      | 3.23           |
|               |          | Repair      | -0.18     | -7.17      | 3.18           |
|               | Ibadan   | Repair      | -0.16     | -7.02      | 3.36           |
|               | Aba      | Repair      | -0.13     | -6.85      | 3.74           |
|               |          | Dismantling | -0.16     | -7.09      | 3.15           |
| Roadside Dust | Lagos    | Dismantling | -0.06     | -6.96      | 3.3            |
|               | Aba      | Repair      | 0         | -6.96      | 3.26           |
| Soil          | Lagos    | Burning     | 0.26      | -6.92      | 4.18           |
|               |          | Dismantling | -0.08     | -6.77      | 3.36           |
|               |          | Repair      | -0.14     | -7         | 3.18           |
|               | Ibadan   | Burning     | -0.05     | -6.77      | 3.83           |
|               |          | Dismantling | -0.17     | -6.96      | 3.38           |
|               | Aba      | Burning     | -0.7      | -6.89      | 3.2            |
|               |          | Dismantling | -0.34     | -6.96      | 3.6            |
| Safe Limit    |          |             | 0         | 0          | 0              |

**Supplementary table 17: Hazard Quotient (HQ) ingestion, inhalation, dermal in soil and dust at various e-waste sites and in Lagos**

| Met<br>als | Top Soil 0-10cm   |                   |                   |                   |                   |                   |                   |                   |                   | Floor dust (control soil) |                   |                   |                   |                   |                   | Roadside dust     |                   |                   |
|------------|-------------------|-------------------|-------------------|-------------------|-------------------|-------------------|-------------------|-------------------|-------------------|---------------------------|-------------------|-------------------|-------------------|-------------------|-------------------|-------------------|-------------------|-------------------|
|            | Burning sites     |                   |                   | Dismantling sites |                   |                   | Repair sites      |                   |                   | Dismantling sites         |                   |                   | Repair sites      |                   |                   | Dismantling sites |                   |                   |
|            | HQ <sub>ing</sub> | HQ <sub>inh</sub> | HQ <sub>der</sub> | HQ <sub>ing</sub> | HQ <sub>inh</sub> | HQ <sub>der</sub> | HQ <sub>ing</sub> | HQ <sub>inh</sub> | HQ <sub>der</sub> | HQ <sub>ing</sub>         | HQ <sub>inh</sub> | HQ <sub>der</sub> | HQ <sub>ing</sub> | HQ <sub>inh</sub> | HQ <sub>der</sub> | HQ <sub>ing</sub> | HQ <sub>inh</sub> | HQ <sub>der</sub> |
| V          | 1.9E-03           | 4.1E-10           | 9.91E+01          | 3.9E-03           | 8.6E-10           | 2.08E+02          | 7.8E-04           | 1.7E-10           | 4.18E+01          | 2.9E-03                   | 6.4E-10           | 1.56E+02          | 2.0E-03           | 4.4E-10           | 1.07E+02          | 2.7E-03           | 5.9E-10           | 1.4E+02           |
| Cr         | 8.8E-03           | 1.2E-09           | 4.88E+02          | 1.3E-02           | 1.7E-09           | 7.33E+02          | 6.3E-03           | 8.4E-10           | 3.50E+02          | 1.0E-02                   | 1.3E-09           | 5.54E+02          | 7.3E-03           | 9.7E-10           | 4.05E+02          | 8.0E-03           | 1.1E-09           | 4.4E+02           |
| Mn         | 4.4E-04           | 5.4E-09           | 6.09E-01          | 1.9E-03           | 2.4E-08           | 2.64E+00          | 2.2E-04           | 2.8E-09           | 3.10E-01          | 1.9E-03                   | 2.3E-08           | 2.59E+00          | 8.3E-04           | 1.0E-08           | 1.15E+00          | 1.2E-03           | 1.4E-08           | 1.6E+00           |
| Co         | 1.9E-04           | 4.2E-10           | 2.66E-01          | 3.2E-04           | 7.1E-10           | 4.49E-01          | 1.9E-04           | 4.2E-10           | 2.66E-01          | 1.9E-04                   | 4.2E-10           | 2.66E-01          | 1.9E-04           | 4.2E-10           | 2.66E-01          | 3.6E-04           | 7.9E-10           | 5.0E-01           |
| Ni         | 6.8E-03           | 2.4E-08           | 2.35E+02          | 1.7E-03           | 6.0E-09           | 5.98E+01          | 3.5E-03           | 1.2E-08           | 1.21E+02          | 3.5E-03                   | 1.2E-08           | 1.20E+02          | 9.8E-04           | 3.4E-09           | 3.39E+01          | 2.9E-03           | 1.0E-08           | 1.0E+02           |
| Cu         | 1.2E-01           | 1.5E-20           | 1.68E+02          | 7.3E-03           | 9.2E-22           | 1.01E+01          | 2.6E-04           | 3.3E-23           | 3.67E-01          | 7.4E-03                   | 9.3E-22           | 1.02E+01          | 7.9E-04           | 9.9E-23           | 1.09E+00          | 2.3E-03           | 2.9E-22           | 3.1E+00           |
| Zn         | 4.0E-03           |                   | 5.60E+00          | 1.0E-03           |                   | 1.44E+00          | 3.1E-05           |                   | 4.35E-02          | 1.7E-03                   |                   | 2.38E+00          | 4.0E-04           |                   | 5.54E-01          | 1.2E-03           |                   | 1.6E+00           |
| As         | 1.1E-01           | 9.4E-09           | 1.43E+01          | 6.3E-03           | 5.6E-10           | 2.63E+00          | 4.6E-03           | 4.1E-10           | 1.92E+00          | 7.3E-03                   | 6.4E-10           | 3.0E+00           | 3.2E-04           | 2.8E-11           | 1.33E-01          | 1.7E-02           | 1.5E-09           | 6.9E+00           |
| Se         | 4.6E-04           | 5.1E-13           | 6.39E-01          | 1.5E-05           | 1.7E-14           | 2.13E-02          | 1.9E-05           | 2.1E-14           | 2.66E-02          | 5.0E-05                   | 5.5E-14           | 6.92E-02          | 1.9E-05           | 2.1E-14           | 2.66E-02          | 4.6E-05           | 5.1E-14           | 6.4E-02           |
| Mo         | 6.5E-04           |                   | 9.05E-01          | 3.8E-05           |                   | 5.33E-02          | 1.2E-04           |                   | 1.60E-01          | 3.8E-05                   |                   | 5.33E-02          | 3.8E-05           |                   | 5.33E-02          | 3.8E-05           |                   | 5.3E-02           |
| Ag         | 3.2E-03           |                   | 1.09E+02          | 4.2E-04           |                   | 1.46E+01          | 7.7E-05           |                   | 2.66E+00          | 2.6E-03                   |                   | 9.19E+01          | 1.0E-04           |                   | 3.46E+00          | 5.9E-04           |                   | 2.1E+01           |
| Cd         | 4.0E-03           | 1.8E-09           | 2.22E+00          | 9.8E-04           | 4.3E-10           | 5.43E-01          | 9.8E-04           | 4.3E-10           | 5.43E-01          | 9.8E-04                   | 4.3E-10           | 5.43E-01          | 9.8E-04           | 4.3E-10           | 5.43E-01          | 9.8E-04           | 4.3E-10           | 5.4E-01           |
| Sn         | 1.7E-03           |                   | 2.42E+00          | 3.4E-05           |                   | 4.74E-02          | 1.8E-06           |                   | 2.49E-03          | 2.2E-04                   |                   | 3.10E-01          | 6.8E-05           |                   | 9.41E-02          | 4.0E-05           |                   | 5.6E-02           |
| Sb         | 1.5E+00           |                   | 1.37E+04          | 2.2E-02           |                   | 2.00E+02          | 1.4E-03           |                   | 1.33E+01          | 4.1E-02                   |                   | 3.82E+02          | 3.8E-03           |                   | 3.55E+01          | 1.3E-02           |                   | 1.2E+02           |
| Ba         | 2.6E-03           | 4.7E-09           | 5.24E+01          | 4.9E-04           | 8.7E-10           | 9.75E+00          | 2.1E-04           | 3.6E-10           | 4.06E+00          | 1.4E-03                   | 2.4E-09           | 2.72E+01          | 4.4E-04           | 7.7E-10           | 8.64E+00          | 9.6E-04           | 1.7E-09           | 1.9E+01           |
| Hg         | 6.4E-04           | 2.8E-12           | 1.27E+01          | 3.1E-03           | 1.4E-11           | 6.2E+01           | 6.4E-04           | 2.8E-12           | 1.3E+01           | 2.9E-03                   | 1.3E-11           | 5.8E+1            | 6.4E-04           | 2.8E-12           | 1.3E+01           | 2.3E-04           | 1.0E-12           | 4.6E+00           |
| Pb         |                   |                   |                   |                   |                   |                   |                   |                   |                   |                           |                   |                   |                   |                   |                   |                   |                   |                   |
| Ta         | 1.9E-02           |                   | 2.66E+01          | 7.6E-01           |                   | 1.06E+03          | 6.9E-01           |                   | 9.59E+02          | 2.3E-01                   |                   | 3.20E+02          | 6.3E-01           |                   | 8.73E+02          | 8.1E-01           |                   | 1.1E+03           |
| Fe         | 4.0E-03           |                   | 5.61E+00          | 1.7E-02           |                   | 2.38E+01          | 6.0E-03           |                   | 8.37E+00          | 1.8E-02                   |                   | 2.51E+01          | 9.1E-03           |                   | 1.26E+01          | 1.4E-02           |                   | 1.9E+01           |
| Tl         |                   | 7.7E-08           |                   |                   | 1.3E-07           |                   |                   | 8.7E-08           |                   |                           | 8.0E-08           |                   |                   | 5.2E-08           |                   |                   | 7.7E-08           |                   |
| ΣHQ        | 1.8E+00           | 1.2E-07           | 1.5E+04           | 8.4E-01           | 1.7E-07           | 2.3E+03           | 7.2E-01           | 1.0E-07           | 1.5E+03           | 3.3E-01                   | 1.2E-07           | 1.7E+03           | 6.6E-01           | 6.8E-08           | 1.5E+03           | 8.7E-01           | 1.1E-07           | 2.0E+03           |

**Supplementary table 18: Hazard Quotient (HQ) ingestion, inhalation, dermal in soil and dust at various e-waste sites in Ibadan**

| Metals     | Top Soil 0-10cm   |                   |                   |                   |                   |                   | Floor dust (control soil) |                   |                   | Direct dust       |                   |                   |                   |                   |                   |
|------------|-------------------|-------------------|-------------------|-------------------|-------------------|-------------------|---------------------------|-------------------|-------------------|-------------------|-------------------|-------------------|-------------------|-------------------|-------------------|
|            | Burning sites     |                   |                   | Dismantling sites |                   |                   | Repair sites              |                   |                   | Dismantling sites |                   |                   | Repair sites      |                   |                   |
|            | HQ <sub>ing</sub> | HQ <sub>inh</sub> | HQ <sub>der</sub> | HQ <sub>ing</sub> | HQ <sub>inh</sub> | HQ <sub>der</sub> | HQ <sub>ing</sub>         | HQ <sub>inh</sub> | HQ <sub>der</sub> | HQ <sub>ing</sub> | HQ <sub>inh</sub> | HQ <sub>der</sub> | HQ <sub>ing</sub> | HQ <sub>inh</sub> | HQ <sub>der</sub> |
| <b>V</b>   | 4.1E-03           | 9.1E-10           | 2.21E+02          | 4.2E-03           | 9.4E-10           | 2.26E+02          | 5.0E-03                   | 1.1E-09           | 2.66E+02          | 7.1E-02           | 1.6E-08           | 3.78E+03          | 8.5E-03           | 1.9E-09           | 4.55E+02          |
| <b>Cr</b>  | 1.6E-02           | 2.1E-09           | 8.73E+02          | 1.3E-02           | 1.8E-09           | 7.46E+02          | 1.5E-02                   | 2.0E-09           | 8.59E+02          | 1.8E-03           | 2.4E-10           | 1.02E+02          | 1.8E-02           | 2.4E-09           | 1.00E+03          |
| <b>Mn</b>  | 2.0E-03           | 2.5E-08           | 2.81E+00          | 1.5E-03           | 1.9E-08           | 2.14E+00          | 2.1E-03                   | 2.6E-08           | 2.88E+00          | 4.4E-03           | 5.4E-08           | 6.11E+00          | 2.2E-03           | 2.7E-08           | 3.03E+00          |
| <b>Co</b>  | 1.9E-04           | 4.2E-10           | 2.66E-01          | 1.9E-04           | 4.2E-10           | 2.66E-01          | 1.9E-04                   | 4.2E-10           | 2.66E-01          | 9.3E-03           | 2.0E-08           | 1.28E+01          | 1.9E-04           | 4.2E-10           | 2.66E-01          |
| <b>Ni</b>  | 3.2E-03           | 1.1E-08           | 1.13E+02          | 2.3E-03           | 7.9E-09           | 7.87E+01          | 1.5E-03                   | 5.2E-09           | 5.20E+01          | 1.1E-02           | 3.9E-08           | 3.87E+02          | 2.7E-03           | 9.4E-09           | 9.44E+01          |
| <b>Cu</b>  | 1.2E-01           | 1.5E-20           | 1.70E+02          | 1.3E-02           | 1.6E-21           | 1.79E+01          | 3.1E-03                   | 3.9E-22           | 4.30E+00          | 4.0E-04           | 5.1E-23           | 5.59E-01          | 3.1E-03           | 3.9E-22           | 4.27E+00          |
| <b>Zn</b>  | 4.3E-03           |                   | 5.91E+00          | 2.3E-03           |                   | 3.25E+00          | 1.5E-03                   |                   | 2.05E+00          | 1.6E-04           |                   | 2.17E-01          | 3.2E-03           |                   | 4.37E+00          |
| <b>As</b>  | 1.3E-01           | 1.2E-08           | 5.5E+01           | 1.3E-02           | 1.2E-09           | 5.5+00            | 3.2E-04                   | 2.8E-11           | 1.33E-01          | 1.5E-03           | 1.4E-10           | 6.4E-01           | 6.4E-03           | 5.6E-10           | 2.66E+00          |
| <b>Se</b>  | 2.0E-03           | 2.2E-12           | 2.77E+00          | 3.4E-04           | 3.7E-13           | 4.69E-01          | 7.7E-05                   | 8.5E-14           | 1.07E-01          | 1.9E-05           | 2.1E-14           | 2.66E-02          | 6.9E-05           | 7.6E-14           | 9.59E-02          |
| <b>Mo</b>  | 6.1E-04           |                   | 8.52E-01          | 5.5E-04           |                   | 7.67E-01          | 4.6E-05                   |                   | 6.39E-02          | 1.0E-04           |                   | 1.38E-01          | 2.1E-04           |                   | 2.88E-01          |
| <b>Ag</b>  | 1.2E-03           |                   | 4.26E+01          | 6.5E-04           |                   | 2.26E+01          | 4.2E-04                   |                   | 1.46E+01          | 1.0E-04           |                   | 3.59E+00          | 1.2E-03           |                   | 3.99E+01          |
| <b>Cd</b>  | 2.7E-03           | 1.2E-09           | 1.49E+00          | 9.8E-04           | 4.3E-10           | 5.43E-01          | 9.8E-04                   | 4.3E-10           | 5.43E-01          | 9.8E-04           | 4.3E-10           | 5.43E-01          | 1.0E-03           | 4.6E-10           | 5.75E-01          |
| <b>Sn</b>  | 7.8E-04           |                   | 1.08E+00          | 7.6E-05           |                   | 1.05E-01          | 6.2E-04                   |                   | 8.61E-01          | 9.6E-07           |                   | 1.33E-03          | 3.4E-05           |                   | 4.70E-02          |
| <b>Sb</b>  | 5.7E-01           |                   | 5.25E+03          | 5.0E-02           |                   | 4.62E+02          | 1.9E-02                   |                   | 1.78E+02          | 1.4E-03           |                   | 1.33E+01          | 4.6E-02           |                   | 4.26E+02          |
| <b>Ba</b>  | 1.8E-03           | 3.2E-09           | 3.54E+01          | 1.1E-03           | 2.0E-09           | 2.24E+01          | 9.0E-04                   | 1.6E-09           | 1.78E+01          | 1.7E-04           | 3.0E-10           | 3.42E+00          | 2.0E-03           | 3.6E-09           | 3.99E+01          |
| <b>Hg</b>  | 5.9E-03           | 2.6E-11           | 1.2E+02           | 1.7E-03           | 7.3E-12           | 3.3E+01           | 9.0E-04                   | 4.0E-12           | 1.8E+01           | 6.4E-04           | 2.8E-12           | 1.3E+01           | 3.5E-03           | 1.5E-11           | 6.9E+01           |
| <b>Pb</b>  |                   |                   |                   |                   |                   |                   |                           |                   |                   |                   |                   |                   |                   |                   |                   |
| <b>Ta</b>  | 1.9E-02           |                   | 2.66E+01          | 5.4E-01           |                   | 7.46E+02          | 6.1E-01                   |                   | 8.52E+02          | 6.9E-01           |                   | 9.59E+02          | 1.4E+00           |                   | 1.92E+03          |
| <b>Fe</b>  | 1.7E-02           |                   | 2.39E+01          | 2.7E-02           |                   | 3.81E+01          | 2.3E-02                   |                   | 3.24E+01          | 9.6E-02           |                   | 1.33E+02          | 3.1E-02           |                   | 4.36E+01          |
| <b>Tl</b>  |                   | 1.1E-07           |                   |                   | 7.9E-08           |                   |                           | 5.9E-08           |                   |                   | 9.0E-07           |                   |                   | 8.4E-08           |                   |
| <b>ΣHQ</b> | <b>9.0E-01</b>    | <b>1.7E-07</b>    | <b>6.8E+03</b>    | <b>6.7E-01</b>    | <b>1.1E-07</b>    | <b>2.4E+03</b>    | <b>6.9E-01</b>            | <b>9.5E-08</b>    | <b>2.3E+03</b>    | <b>8.9E-01</b>    | <b>1.0E-06</b>    | <b>5.4E+03</b>    | <b>1.5E+00</b>    | <b>1.3E-07</b>    | <b>4.0E+03</b>    |

**Supplementary table 19: Hazard Quotient (HQ) ingestion, inhalation, dermal in soil and dust at various e-waste sites and in Aba**

| Metals     | Top Soil 0-10cm   |                   |                   |                   |                   |                   | Floor dust        |                   |                   |                   |                   |                   | Roadside dust     |                   |                   |
|------------|-------------------|-------------------|-------------------|-------------------|-------------------|-------------------|-------------------|-------------------|-------------------|-------------------|-------------------|-------------------|-------------------|-------------------|-------------------|
|            | Burning sites     |                   |                   | Dismantling sites |                   |                   | Dismantling sites |                   |                   | Repair sites      |                   |                   |                   |                   |                   |
|            | HQ <sub>ing</sub> | HQ <sub>inh</sub> | HQ <sub>der</sub> | HQ <sub>ing</sub> | HQ <sub>inh</sub> | HQ <sub>der</sub> | HQ <sub>ing</sub> | HQ <sub>inh</sub> | HQ <sub>der</sub> | HQ <sub>ing</sub> | HQ <sub>inh</sub> | HQ <sub>der</sub> | HQ <sub>ing</sub> | HQ <sub>inh</sub> | HQ <sub>der</sub> |
| <b>V</b>   | 2.2E-03           | 4.7E-10           | 1.15E+02          | 3.5E-03           | 7.8E-10           | 1.88E+02          | 2.0E-03           | 4.4E-10           | 1.07E+02          | 1.3E-03           | 2.9E-10           | 6.96E+01          | 3.2E-03           | 7.1E-10           | 1.7E+02           |
| <b>Cr</b>  | 1.3E-02           | 1.7E-09           | 7.24E+02          | 2.5E-02           | 3.3E-09           | 1.40E+03          | 2.4E-02           | 3.2E-09           | 1.33E+03          | 5.4E-03           | 7.1E-10           | 2.98E+02          | 3.8E-03           | 5.1E-10           | 2.1E+02           |
| <b>Mn</b>  | 1.1E-03           | 1.4E-08           | 1.59E+00          | 1.5E-03           | 1.8E-08           | 2.05E+00          | 1.8E-03           | 2.2E-08           | 2.49E+00          | 8.4E-04           | 1.0E-08           | 1.17E+00          | 7.5E-04           | 9.3E-09           | 1.0E+00           |
| <b>Co</b>  | 1.9E-04           | 4.2E-10           | 2.66E-01          | 1.9E-04           | 4.2E-10           | 2.66E-01          | 1.9E-04           | 4.2E-10           | 2.66E-01          | 1.9E-04           | 4.2E-10           | 2.66E-01          | 1.9E-04           | 4.2E-10           | 2.7E-01           |
| <b>Ni</b>  | 3.0E-03           | 1.0E-08           | 1.04E+02          | 5.3E-03           | 1.9E-08           | 1.85E+02          | 5.2E-03           | 1.8E-08           | 1.80E+02          | 8.0E-04           | 2.8E-09           | 2.78E+01          | 5.6E-04           | 1.9E-09           | 1.9E+01           |
| <b>Cu</b>  | 4.3E-02           | 5.4E-21           | 5.90E+01          | 7.6E-02           | 9.5E-21           | 1.05E+02          | 1.3E-01           | 1.6E-20           | 1.81E+02          | 1.8E-03           | 2.3E-22           | 2.54E+00          | 2.2E-04           | 2.8E-23           | 3.1E-01           |
| <b>Zn</b>  | 4.5E-03           |                   | 6.31E+00          | 7.2E-03           | #DIV/0!           | 1.00E+01          | 6.9E-03           |                   | 9.59E+00          | 6.1E-04           |                   | 8.41E-01          | 1.5E-04           |                   | 2.1E-01           |
| <b>As</b>  | 3.1E-02           | 2.7E-09           | 1.28E+01          | 5.1E-02           | 4.5E-09           | 2.13E+01          | 9.1E-02           | 8.0E-09           | 3.78E+01          | 3.2E-04           | 2.8E-11           | 1.33E-01          | 3.2E-04           | 2.8E-11           | 1.3E-01           |
| <b>Se</b>  | 1.9E-04           | 2.1E-13           | 2.66E-01          | 8.8E-04           | 9.7E-13           | 1.22E+00          | 3.1E-04           | 3.4E-13           | 4.26E-01          | 1.9E-05           | 2.1E-14           | 2.66E-02          | 1.9E-05           | 2.1E-14           | 2.7E-02           |
| <b>Mo</b>  | 1.1E-03           |                   | 1.49E+00          | 1.3E-03           |                   | 1.81E+00          | 1.3E-03           |                   | 1.86E+00          | 3.8E-05           |                   | 5.33E-02          | 3.8E-05           |                   | 5.3E-02           |
| <b>Ag</b>  | 6.1E-04           |                   | 2.13E+01          | 1.1E-03           |                   | 3.86E+01          | 3.1E-03           |                   | 1.07E+02          | 7.7E-05           |                   | 2.66E+00          | 7.7E-05           |                   | 2.7E+00           |
| <b>Cd</b>  | 1.9E-04           | 8.5E-11           | 1.07E-01          | 9.2E-03           | 4.1E-09           | 5.11E+00          | 1.2E-02           | 5.1E-09           | 6.39E+00          | 9.8E-04           | 4.3E-10           | 5.43E-01          | 9.8E-04           | 4.3E-10           | 5.4E-01           |
| <b>Sn</b>  | 5.2E-05           |                   | 7.19E-02          | 1.5E-04           |                   | 2.11E-01          | 4.7E-04           |                   | 6.57E-01          | 2.2E-04           |                   | 3.00E-01          | 3.5E-06           |                   | 4.9E-03           |
| <b>Sb</b>  | 4.7E-02           |                   | 4.35E+02          | 1.9E-01           |                   | 1.80E+03          | 3.7E-01           |                   | 3.39E+03          | 9.6E-03           |                   | 8.88E+01          | 1.1E-03           |                   | 9.8E+00           |
| <b>Ba</b>  | 1.9E-03           | 3.3E-09           | 3.70E+01          | 7.5E-03           | 1.3E-08           | 1.49E+02          | 1.9E-03           | 3.4E-09           | 3.77E+01          | 4.1E-04           | 7.3E-10           | 8.18E+00          | 3.3E-04           | 5.8E-10           | 6.5E+00           |
| <b>Hg</b>  | 6.4E-04           | 2.8E-12           | 1.3E+01           | 6.4E-04           | 2.8E-12           | 1.3E+01           | 6.4E-04           | 2.8E-12           | 1.3E+01           | 6.4E-04           | 2.8E-12           | 1.3E+01           | 1.3E+01           | 5.6E-12           | 2.5E+01           |
| <b>Pb</b>  |                   |                   |                   |                   |                   |                   |                   |                   |                   |                   |                   |                   |                   |                   |                   |
| <b>Ta</b>  | 1.9E-02           |                   | 2.66E+01          | 3.8E-02           |                   | 5.33E+01          | 3.8E-02           |                   | 5.33E+01          | 6.5E-01           |                   | 9.05E+02          | 1.0E+00           |                   | 1.4E+03           |
| <b>Fe</b>  | 2.8E-02           |                   | 3.91E+01          | 3.8E-02           |                   | 5.33E+01          | 5.3E-02           |                   | 7.40E+01          | 1.0E-02           |                   | 1.43E+01          | 9.8E-03           |                   | 1.4E+01           |
| <b>Tl</b>  |                   | 9.7E-08           |                   |                   | 4.4E-08           |                   |                   | 8.4E-08           |                   |                   | 6.5E-08           |                   |                   | 9.3E-08           |                   |
| <b>ΣHQ</b> | <b>2.0E-01</b>    | <b>1.3E-07</b>    | <b>1.6E+03</b>    | <b>4.6E-01</b>    | <b>1.1E-07</b>    | <b>4.0E+03</b>    | <b>7.4E-01</b>    | <b>1.4E-07</b>    | <b>5.5E+03</b>    | <b>6.9E-01</b>    | <b>8.1E-08</b>    | <b>1.4E+03</b>    | <b>1.0E+00</b>    | <b>1.1E-07</b>    | <b>1.8E+03</b>    |

**Supplementary table 20: Oral Reference Dose(RfD), Inhalation Reference dose(RfC), gastrointestinal absorption factor (GIABS) for metals**

| <b>Metals</b> | <b>RfD</b> | <b>RfC</b> | <b>GIABS</b> |
|---------------|------------|------------|--------------|
| <b>V</b>      | 5.00E-03   | 1.00E-04   | 2.60E-02     |
| <b>Cr</b>     | 3.00E-03   | 1.00E-04   | 2.50E-02     |
| <b>Mn</b>     | 1.40E-01   | 5.00E-05   | 1.00E+00     |
| <b>Co</b>     | 3.00E-03   | 6.00E-06   | 1.00E+00     |
| <b>Ni</b>     | 1.10E-02   | 1.40E-05   | 4.00E-02     |
| <b>Cu</b>     | 4.00E-02   | 1.40E+09   | 1.00E+00     |
| <b>Zn</b>     | 3.00E-01   |            | 1.00E+00     |
| <b>As</b>     | 3.00E-04   | 1.50E-05   | 1.00E+00     |
| <b>Se</b>     | 5.00E-03   | 2.00E-02   | 1.00E+00     |
| <b>Mo</b>     | 5.00E-03   |            | 1.00E+00     |
| <b>Ag</b>     | 5.00E-03   |            | 4.00E-02     |
| <b>Cd</b>     | 1.00E-03   | 1.00E-05   | 2.50E-02     |
| <b>Sn</b>     | 6.00E-01   |            | 1            |
| <b>Sb</b>     | 4.00E-04   | 0.00E+00   | 1.50E-01     |
| <b>Ba</b>     | 2.00E-01   | 5.00E-04   | 7.00E-02     |
| <b>Hg</b>     | 3.00E-04   | 3.00E-04   | 0.07         |
| <b>Pb</b>     | 8.50E-03   | 1.20E-05   |              |
| <b>Ta</b>     | 1.00E-05   |            | 1.00E+00     |
| <b>Fe</b>     | 7.00E-01   |            | 1.00E+00     |
| <b>Ti</b>     |            | 1.00E-04   | 1            |

**Supplementary table 21: Cancer risk of BDE-209 through ingestion, inhalation, dermal in soil and dust at various e-waste sites and in Lagos**

| PBDE    | SF      | Top soil         |                  |                  |                   |                  |                  |                  |                  |                  | Floor dust (control soil) |                  |                  |                  |                  |                  | Roadside dust     |                  |                  |
|---------|---------|------------------|------------------|------------------|-------------------|------------------|------------------|------------------|------------------|------------------|---------------------------|------------------|------------------|------------------|------------------|------------------|-------------------|------------------|------------------|
|         |         | Burning sites    |                  |                  | Dismantling sites |                  |                  | Repair sites     |                  |                  | Dismantling sites         |                  |                  | Repair sites     |                  |                  | Dismantling sites |                  |                  |
|         |         | R <sub>ing</sub> | R <sub>inh</sub> | R <sub>der</sub> | R <sub>ing</sub>  | R <sub>inh</sub> | R <sub>der</sub> | R <sub>ing</sub> | R <sub>inh</sub> | R <sub>der</sub> | R <sub>ing</sub>          | R <sub>inh</sub> | R <sub>der</sub> | R <sub>ing</sub> | R <sub>inh</sub> | R <sub>der</sub> | R <sub>ing</sub>  | R <sub>inh</sub> | R <sub>der</sub> |
| BDE-209 | 7.0E-04 | 4.73E-09         |                  | 6.6E-06          | 4.0E-10           |                  | 5.6E-07          | 2.3E-13          |                  | 3.2E-10          | 8.1E-10                   |                  | 1.1E-06          | 1.2E-10          |                  | 1.6E-07          | 2.6E-10           |                  | 3.6E-07          |

**Supplementary table 22: Cancer risk of BDE-209 through ingestion, inhalation, dermal in soil and dust at various e-waste In Ibadan**

| PBDE    | SF      | Top soil         |                  |                  |                   |                  |                  | Floor dust (control soil) |                  |                  | Direct dust       |                  |                  |                  |                  |                  |
|---------|---------|------------------|------------------|------------------|-------------------|------------------|------------------|---------------------------|------------------|------------------|-------------------|------------------|------------------|------------------|------------------|------------------|
|         |         | Burning sites    |                  |                  | Dismantling sites |                  |                  | Repair sites              |                  |                  | Dismantling sites |                  |                  | Repair sites     |                  |                  |
|         |         | R <sub>ing</sub> | R <sub>inh</sub> | R <sub>der</sub> | R <sub>ing</sub>  | R <sub>inh</sub> | R <sub>der</sub> | R <sub>ing</sub>          | R <sub>inh</sub> | R <sub>der</sub> | R <sub>ing</sub>  | R <sub>inh</sub> | R <sub>der</sub> | R <sub>ing</sub> | R <sub>inh</sub> | R <sub>der</sub> |
| BDE-209 | 7.0E-04 | 1.6E-06          |                  | 2.2E-03          | 3.5E-09           | 1.5E-17          | 4.8E-06          | 2.2E-06                   | 9.5E-15          | 3.0E-03          | 8.5E-06           | 3.8E-14          | 1.2E-02          | 3.9E-07          | 1.7E-15          | 5.5E-04          |

**Supplementary table 23: Cancer risk of BDE-209 through ingestion, inhalation, dermal in soil and dust at various e-waste sites and in Aba**

| PBDE    | SF      | Top soil         |                  |                  | Floor dust (control soil) |                  |                  | Roadside dust    |                  |                  |
|---------|---------|------------------|------------------|------------------|---------------------------|------------------|------------------|------------------|------------------|------------------|
|         |         | Burning sites    |                  |                  | Repair sites              |                  |                  | Repair sites     |                  |                  |
|         |         | R <sub>ing</sub> | R <sub>inh</sub> | R <sub>der</sub> | R <sub>ing</sub>          | R <sub>inh</sub> | R <sub>der</sub> | R <sub>ing</sub> | R <sub>inh</sub> | R <sub>der</sub> |
| BDE-209 | 7.0E-04 | 2.8E-08          |                  | 3.9E-05          | 1.4E-07                   | 6.3E-16          | 2.05E-04         | 1.9E-08          | 8.2E-17          | 2.6E-05          |

**Supplementary table 24: Cancer risk of metals through ingestion, inhalation, dermal in soil and dust at various e-waste sites and in Lagos**

| Metals    |          |          |         | Top soil         |                  |                  |                   |                  |                  |                  |                  |                  | Floor dust (control soil) |                  |                  |                  |                  |                  | Roadside dust     |                  |                  |
|-----------|----------|----------|---------|------------------|------------------|------------------|-------------------|------------------|------------------|------------------|------------------|------------------|---------------------------|------------------|------------------|------------------|------------------|------------------|-------------------|------------------|------------------|
|           |          |          |         | Burning sites    |                  |                  | Dismantling sites |                  |                  | Repair sites     |                  |                  | Dismantling sites         |                  |                  | Repair sites     |                  |                  | Dismantling sites |                  |                  |
|           | Sfora    | IUR      | GIABS   | R <sub>ing</sub> | R <sub>inh</sub> | R <sub>der</sub> | R <sub>ing</sub>  | R <sub>inh</sub> | R <sub>der</sub> | R <sub>ing</sub> | R <sub>inh</sub> | R <sub>der</sub> | R <sub>ing</sub>          | R <sub>inh</sub> | R <sub>der</sub> | R <sub>ing</sub> | R <sub>inh</sub> | R <sub>der</sub> | R <sub>ing</sub>  | R <sub>inh</sub> | R <sub>der</sub> |
| Cr        | 5.0E-01  | 8.4E-02  | 2.5E-02 | 1.3E-05          | 9.8E-15          | 4.6E-04          | 2.0E-05           | 1.5E-14          | 6.9E-04          | 9.5E-06          | 7.0E-15          | 3.3E-04          | 1.5E-05                   | 1.1E-14          | 5.2E-04          | 1.1E-05          | 8.1E-15          | 3.8E-04          | 1.2E-05           | 8.9E-15          | 4.2E-04          |
| Co        |          | 9.0E-03  | 1       | 0                | 2.3E-17          |                  |                   | 3.9E-17          |                  |                  | 2.3E-17          |                  |                           | 2.3E-17          |                  |                  | 2.3E-17          |                  |                   | 4.3E-17          |                  |
| Ni        |          | 2.6E-04  | 4.0E-02 | 0                | 8.6E-17          |                  |                   | 2.2E-17          |                  |                  | 4.4E-17          |                  |                           | 4.4E-17          |                  |                  | 1.2E-17          |                  |                   | 3.7E-17          |                  |
| As        | 1.5      | 4.3E-03  | 1       | 4.8E-05          | 6.1E-16          | 2.0E-02          | 2.8E-06           | 3.6E-17          | 1.2E-03          | 2.1E-06          | 2.6E-17          | 8.6E-04          | 3.3E-06                   | 4.2E-17          | 1.4E-03          | 1.4E-07          | 1.8E-18          | 6.0E-05          | 7.5E-06           | 9.5E-17          | 3.1E-03          |
| Cd        |          | 1.8E-03  | 2.5E-02 | 0                | 3.2E-17          |                  |                   | 7.8E-18          |                  |                  | 7.8E-18          |                  |                           | 7.8E-18          |                  |                  | 7.8E-18          |                  |                   | 7.8E-18          |                  |
| Hg        |          | 3.00E-04 | 0.07    | 0                | 2.5E-19          |                  |                   | 1.2E-18          |                  |                  | 2.5E-19          |                  |                           | 1.2E-18          |                  |                  | 2.5E-19          |                  |                   | 9.1E-20          |                  |
| Pb        | 8.50E-03 | 1.20E-05 | 1       | 2.1E-05          | 1.3E-16          | 2.9E-02          | 6.5E-07           | 4.0E-18          | 9.0E-04          | 4.0E-08          | 2.5E-19          | 5.5E-05          | 9.0E-07                   | 5.6E-18          | 1.3E-03          | 1.9E-07          | 1.2E-18          | 2.6E-04          | 1.2E-06           | 7.6E-18          | 1.7E-03          |
| <b>HI</b> |          |          |         | 8.2E-05          | 1.1E-14          | 4.9E-02          | 2.3E-05           | 1.5E-14          | 2.8E-03          | 1.2E-05          | 7.1E-15          | 1.2E-03          | 1.9E-05                   | 1.1E-14          | 3.1E-03          | 1.1E-05          | 8.2E-15          | 7.0E-04          | 2.1E-05           | 9.1E-15          | 5.2E-03          |

IUR = Inhalation Unit Risk. SF= Slope factor. GIABS = gastrointestinal absorption factor



**Supplementary table 25: Cancer risk of metals through ingestion, inhalation, dermal in soil and dust at various e-waste sites and in Ibadan**

| Metals | Sforal   | IUR      | GIABS   | Top soil           |                  |                   |                    |                  |                  | Floor dust (control soil) |                  |                  |                   |                  |                    | Direct dust      |                  |                  |
|--------|----------|----------|---------|--------------------|------------------|-------------------|--------------------|------------------|------------------|---------------------------|------------------|------------------|-------------------|------------------|--------------------|------------------|------------------|------------------|
|        |          |          |         | Burning sites      |                  |                   | Dismantling sites  |                  |                  | Dismantling sites         |                  |                  | Dismantling sites |                  |                    | Repair sites     |                  |                  |
|        |          |          |         | R <sub>ing</sub> = | R <sub>inh</sub> | R <sub>derl</sub> | R <sub>ing</sub> = | R <sub>inh</sub> | R <sub>der</sub> | R <sub>ing</sub>          | R <sub>inh</sub> | R <sub>der</sub> | R <sub>ing</sub>  | R <sub>inh</sub> | R <sub>der</sub> = | R <sub>ing</sub> | R <sub>inh</sub> | R <sub>der</sub> |
| Cr     | 5.0E-01  | 8.4E-02  | 2.5E-02 | 2.4E-05            | 1.8E-14          | 8.2E-04           | 2.0E-05            | 1.5E-14          | 7.0E-04          | 2.3E-05                   | 1.7E-14          | 8.1E-04          | 2.7E-06           | 2.0E-15          | 9.5E-05            | 2.7E-05          | 2.0E-14          | 9.4E-04          |
| Co     |          | 9.0E-03  | 1       |                    | 2.3E-17          |                   |                    | 2.3E-17          |                  |                           | 2.3E-17          |                  |                   | 1.1E-15          |                    |                  | 2.3E-17          |                  |
| Ni     |          | 2.6E-04  | 4.0E-02 |                    | 4.1E-17          |                   |                    | 2.9E-17          |                  |                           | 1.9E-17          |                  |                   | 1.4E-16          |                    |                  | 3.4E-17          |                  |
| As     | 1.5      | 4.3E-03  | 1       | 5.9E-05            | 7.5E-16          | 2.5E-02           | 5.9E-06            | 7.5E-17          | 2.5E-03          | 1.4E-07                   | 1.8E-18          | 6.0E-05          | 6.9E-07           | 8.7E-18          | 2.9E-04            | 2.9E-06          | 3.6E-17          | 1.2E-03          |
| Cd     |          | 1.8E-03  | 2.5E-02 |                    | 2.1E-17          |                   |                    | 7.8E-18          |                  |                           | 7.8E-18          |                  |                   | 7.8E-18          |                    |                  | 8.2E-18          |                  |
| Hg     |          | 3.00E-04 | 0.07    |                    | 2.3E-18          |                   |                    | 6.6E-19          |                  |                           | 3.6E-19          |                  |                   | 2.5E-19          |                    |                  | 1.4E-18          |                  |
| Pb     | 8.50E-03 | 1.20E-05 | 1       | 7E-05              | 4.4E-16          | 9.7E-02           | 8.0E-06            | 5.0E-17          | 1.1E-02          | 3.1E-06                   | 1.9E-17          | 4.3E-03          | 1.6E-09           | 1.0E-09          | 2.3E-06            | 1.5E-06          | 9.2E-18          | 2.0E-03          |
| ΣHQ=HI |          |          |         | 1.5E-04            | 1.9E-14          | 1.2E-01           | 3.4E-05            | 1.5E-14          | 1.4E-02          | 2.6E-05                   | 1.7E-14          | 5.2E-03          | 3.4E-06           | 3.3E-15          | 3.9E-04            | 3.1E-05          | 2.0E-14          | 4.2E-03          |

**Supplementary table 26: Cancer risk of metals through ingestion, inhalation, dermal in soil and dust at various e-waste sites and in Aba**

| Metals | Sforal   | IUR      | GIABS   | Top soil         |                  |                  |                   |                  |                  | Floor dust (control soil) |                  |                  |                  |                  |                    | Roadside dust      |                    |                    |
|--------|----------|----------|---------|------------------|------------------|------------------|-------------------|------------------|------------------|---------------------------|------------------|------------------|------------------|------------------|--------------------|--------------------|--------------------|--------------------|
|        |          |          |         | Burning sites    |                  |                  | Dismantling sites |                  |                  | Dismantling sites         |                  |                  | Repair sites     |                  |                    | Repair sites       |                    |                    |
|        |          |          |         | R <sub>ing</sub> | R <sub>inh</sub> | R <sub>der</sub> | R <sub>ing</sub>  | R <sub>inh</sub> | R <sub>der</sub> | R <sub>ing</sub>          | R <sub>inh</sub> | R <sub>der</sub> | R <sub>ing</sub> | R <sub>inh</sub> | R <sub>der</sub> = | R <sub>ing</sub> = | R <sub>inh</sub> = | R <sub>der</sub> = |
| Cr     | 5.0E-01  | 8.4E-02  | 2.5E-02 | 2.0E-05          | 1.5E-14          | 6.8E-04          | 3.8E-05           | 2.8E-14          | 1.3E-03          | 3.6E-05                   | 2.7E-14          | 1.3E-03          | 8.1E-06          | 6.0E-15          | 2.8E-04            | 1.9E-03            | 4.3E-15            | 2.7E+00            |
| Co     |          | 9.0E-03  | 1       | 0                | 2.3E-17          |                  |                   | 2.3E-17          |                  |                           | 2.3E-17          |                  |                  | 2.3E-17          |                    |                    | 2.3E-17            |                    |
| Ni     |          | 2.6E-04  | 4.0E-02 | 0                | 3.8E-17          |                  |                   | 6.7E-17          |                  |                           | 6.6E-17          |                  |                  | 1.0E-17          |                    |                    | 7.0E-18            |                    |
| As     | 1.5      | 4.3E-03  | 1       | 1.4E-05          | 1.7E-16          | 5.8E-03          | 2.3E-05           | 2.9E-16          | 9.6E-03          | 4.1E-05                   | 5.2E-16          | 1.7E-02          | 1.4E-07          | 1.8E-18          | 6.0E-05            | 4.8E-04            | 1.8E-18            | 2.0E-01            |
| Cd     |          | 1.8E-03  | 2.5E-02 | 0                | 1.5E-18          |                  |                   | 7.3E-17          |                  |                           | 9.1E-17          |                  |                  | 7.8E-18          |                    |                    | 7.8E-18            |                    |
| Hg     |          | 3.00E-04 | 0.07    | 0                | 2.5E-19          |                  |                   | 2.5E-19          |                  |                           | 2.5E-19          |                  |                  | 2.5E-19          |                    |                    | 5.1E-19            |                    |
| Pb     | 8.50E-03 | 1.20E-05 | 1       | 4.9E-06          | 3.1E-17          | 6.8E-03          | 7.4E-06           | 4.6E-06          | 1.0E-02          | 1.2E-05                   | 7.7E-17          | 1.7E-02          | 4.9E-07          | 3.0E-18          | 6.8E-04            | 1.1E-07            | 6.9E-19            | 1.5E-04            |
| ΣHQ=HI |          |          |         | 3.8E-05          | 1.5E-14          | 1.3E-02          | 6.8E-05           | 2.9E-14          | 2.1E-02          | 8.9E-05                   | 2.8E-14          | 3.5E-02          | 8.7E-06          | 6.0E-15          | 1.0E-03            | 6.0E-06            | 4.3E-15            | 4.1E-04            |

**Supplementary table 27: Total HI Estimate for PBDEs and Metals for Cancer Risks (log transformed data)**

| Samples       | Location | Activity    | Ingestion | Inhalation | Dermal contact |
|---------------|----------|-------------|-----------|------------|----------------|
| Direct dust   | Ibadan   | Dismantling | -5.47     | -14.52     | -3.41          |
|               |          | Repair      | -4.51     | -13.7      | -2.38          |
| Floor dust    | Lagos    | Dismantling | -4.72     | -13.96     | -2.51          |
|               |          | Repair      | -4.96     | -14.1      | -3.15          |
|               | Ibadan   | Repair      | -4.58     | -13.77     | -2.28          |
|               | Aba      | Dismantling | -4.05     | -13.55     | -1.46          |
|               |          | Repair      | -5.06     | -14.22     | -3             |
| Roadside Dust | Lagos    | Dismantling | -4.68     | -14.05     | -2.28          |
|               | Aba      | Repair      | -5.22     | -14.4      | -3.39          |
| Soil          | Lagos    | Burning     | -4.09     | -13.96     | -1.31          |
|               |          | Dismantling | -4.64     | -13.82     | -2.55          |
|               |          | Repair      | -4.92     | -14.15     | -2.92          |
|               | Ibadan   | Burning     | -3.82     | -13.72     | -0.92          |
|               |          | Dismantling | -4.47     | -13.82     | -1.85          |
|               | Aba      | Burning     | -4.42     | -13.82     | -1.89          |
| Dismantling   |          | -4.17       | -13.54    | -1.68      |                |
| Safe Limit    |          |             | -6        | -6         | -6             |

**Supplementary table 28: Cumulative HI Estimate for PBDEs and Metals for non-cancer effects and Cancer Risks (log transformed data)**

| Samples       | Location | Activity    | Non-cancer Effects | Cancer Risks |
|---------------|----------|-------------|--------------------|--------------|
| Direct dust   | Ibadan   | Dismantling | 3.73               | -3.41        |
|               |          | Repair      | 3.6                | -2.38        |
| Floor dust    | Lagos    | Dismantling | 3.23               | -2.51        |
|               |          | Repair      | 3.18               | -3.15        |
|               | Ibadan   | Repair      | 3.36               | -2.28        |
|               | Aba      | Dismantling | 3.74               | -1.46        |
|               |          | Repair      | 3.15               | -3           |
| Roadside Dust | Lagos    | Dismantling | 3.3                | -2.28        |
|               | Aba      | Repair      | 3.26               | -3.39        |
| Soil          | Lagos    | Burning     | 4.18               | -1.31        |
|               |          | Dismantling | 3.36               | -2.55        |
|               |          | Repair      | 3.18               | -2.92        |
|               | Ibadan   | Burning     | 3.83               | -0.92        |
|               |          | Dismantling | 3.38               | -1.85        |
|               | Aba      | Burning     | 3.2                | -1.89        |
| Dismantling   |          | 3.6         | -1.68              |              |
| Safe Limit    |          |             | 0                  | -6           |

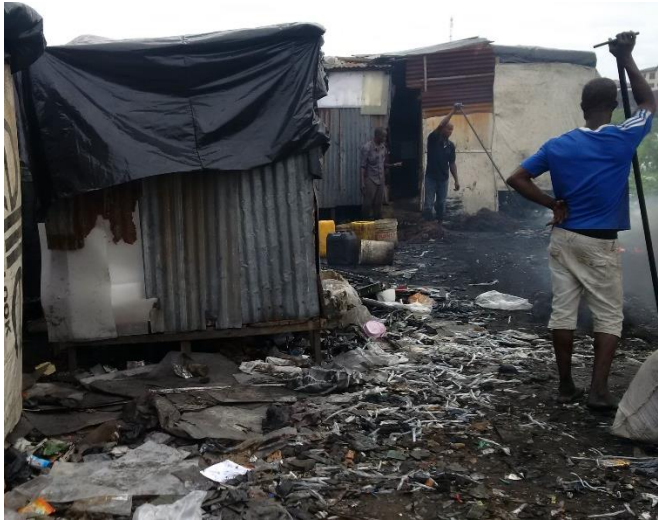

Supplementary Fig. 1D

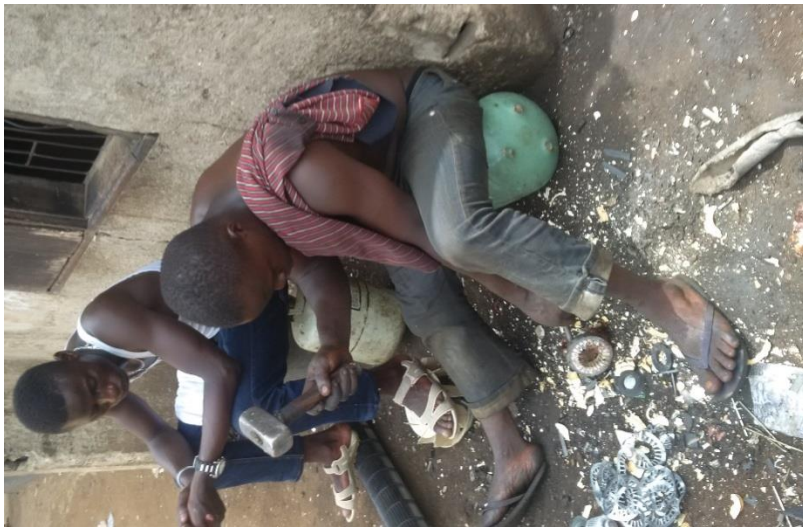

Supplementary Fig. 1E

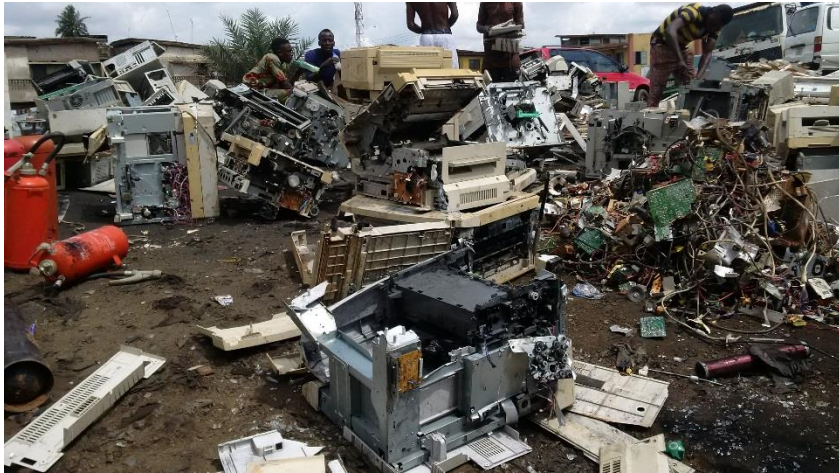

Supplementary Fig. 1F

**Supplementary Fig. 1D-F:**Photos of e-waste workers at the e-waste recycling sites showing no use of PPE
